# Supplementary material for: Transcriptome Analysis of Bovine Macrophages (BoMac) Cells after Infection with Bovine Immunodeficiency Virus
Source: PubMed Central journal article supplement — J Vet Res. 2022 Dec 26;66(4):487–95. doi: 10.2478/jvetres-2022-0072 (PMC9944999; doi:10.2478/jvetres-2022-0072), 2022-12-26
Supplement: jvetres-66-487_sm1.pdf [file jvetres-66-487_sm1.pdf]

**Table S1.** 1,315 differentially expressed genes mapped as unique molecules represented in the Ingenuity Knowledge Base

| Symbol                   | Entrez gene name                                              | Gene symbol     | Expression fold change | Location            | Type(s)                           |
|--------------------------|---------------------------------------------------------------|-----------------|------------------------|---------------------|-----------------------------------|
| DCTN6                    | dynactin subunit 6                                            | <i>DCTN6</i>    | 3.0                    | Cytoplasm           | enzyme                            |
| NHEJ1                    | non-homologous end joining factor 1                           | <i>Nhej1</i>    | 2.9                    | Nucleus             | other                             |
| PGAM2                    | phosphoglycerate mutase 2                                     | <i>PGAM2</i>    | 2.9                    | Cytoplasm           | phosphatase                       |
| LIN9                     | lin-9 DREAM MuvB core complex component                       | <i>LIN9</i>     | 2.8                    | Nucleus             | other                             |
| COL24A1                  | collagen type XXIV alpha 1 chain                              | <i>COL24A1</i>  | 2.7                    | Extracellular Space | other                             |
| ARL3                     | ADP ribosylation factor like GTPase 3                         | <i>Arl3</i>     | 2.7                    | Cytoplasm           | enzyme                            |
| NR1D1                    | nuclear receptor subfamily 1 group D member 1                 | <i>Nr1d1</i>    | 2.6                    | Nucleus             | ligand-dependent nuclear receptor |
| PROCA1                   | protein interacting with cyclin A1                            | <i>PROCA1</i>   | 2.6                    | Cytoplasm           | other                             |
| UTP3                     | UTP3 small subunit processome component                       | <i>UTP3</i>     | 2.6                    | Nucleus             | other                             |
| BTG3                     | BTG anti-proliferation factor 3                               | <i>BTG3</i>     | 2.5                    | Nucleus             | other                             |
| ATR                      | ATR serine/threonine kinase                                   | <i>ATR</i>      | 2.5                    | Nucleus             | kinase                            |
| TSHZ2                    | teashirt zinc finger homeobox 2                               | <i>TSHZ2</i>    | 2.5                    | Nucleus             | transcription regulator           |
| PIGB                     | phosphatidylinositol glycan anchor biosynthesis class B       | <i>PIGB</i>     | 2.4                    | Cytoplasm           | enzyme                            |
| MYL9                     | myosin light chain 9                                          | <i>MYL9</i>     | 2.4                    | Cytoplasm           | other                             |
| ATP6V1H                  | ATPase H <sup>+</sup> transporting V1 subunit H               | <i>ATP6V1H</i>  | 2.4                    | Cytoplasm           | transporter                       |
| NOCT                     | Nocturnin                                                     | <i>CCRN4L</i>   | 2.4                    | Nucleus             | transcription regulator           |
| PACSN1                   | protein kinase C and casein kinase substrate in neurons 1     | <i>Pacsn1</i>   | 2.4                    | Cytoplasm           | kinase                            |
| MXD3                     | MAX dimerisation protein 3                                    | <i>Mxd3</i>     | 2.3                    | Nucleus             | transcription regulator           |
| FZD9                     | frizzled class receptor 9                                     | <i>FZD9</i>     | 2.3                    | Plasma membrane     | G-protein coupled receptor        |
| KANSL1                   | KAT8 regulatory NSL complex subunit 1                         | <i>KIAA1267</i> | 2.3                    | Nucleus             | other                             |
| B3GALT2                  | beta-1,3-galactosyltransferase 2                              | <i>B3galt2</i>  | 2.3                    | Cytoplasm           | enzyme                            |
| STMN2                    | stathmin 2                                                    | <i>STMN2</i>    | 2.3                    | Plasma membrane     | other                             |
| LMF1                     | lipase maturation factor 1                                    | <i>LMF1</i>     | 2.2                    | Cytoplasm           | other                             |
| Sf1                      | splicing factor 1                                             | <i>Sf1</i>      | 2.2                    | Nucleus             | other                             |
| EEF1D                    | eukaryotic translation elongation factor 1 delta              | <i>EEF1D</i>    | 2.2                    | Cytoplasm           | translation regulator             |
| SEPTIN10                 | septin 10                                                     | <i>SEPT10</i>   | 2.2                    | Cytoplasm           | transcription regulator           |
| B3GNT4                   | UDP-GlcNAc:betaGal beta-1,3-N-acetylglucosaminyltransferase 4 | <i>B3GNT4</i>   | 2.2                    | Plasma membrane     | enzyme                            |
| ASNSD1                   | asparagine synthetase domain containing 1                     | <i>Asnsd1</i>   | 2.2                    | Other               | enzyme                            |
| JMJD1C                   | jumonji domain containing 1C                                  | <i>JMJD1C</i>   | 2.2                    | Nucleus             | enzyme                            |
| NUFIP2                   | nuclear FMR1 interacting protein 2                            | <i>NUFIP2</i>   | 2.2                    | Cytoplasm           | other                             |
| CLMN                     | calmin                                                        | <i>CLMN</i>     | 2.1                    | Cytoplasm           | other                             |
| DZIP1                    | DAZ interacting zinc finger protein 1                         | <i>DZIP1</i>    | 2.1                    | Cytoplasm           | other                             |
| ADH4                     | alcohol dehydrogenase 4 (class II), pi polypeptide            | <i>ADH4</i>     | 2.1                    | Cytoplasm           | enzyme                            |
| SLC1A3                   | solute carrier family 1 member 3                              | <i>SLC1A3</i>   | 2.1                    | Plasma membrane     | transporter                       |
| MED29                    | mediator complex subunit 29                                   | <i>MED29</i>    | 2.1                    | Nucleus             | other                             |
| CELF2                    | CUGBP Elav-like family member 2                               | <i>CELF2</i>    | 2.1                    | Nucleus             | other                             |
| Tmsb4x (includes others) | thymosin, beta 4, X chromosome                                | <i>Tmsb15a</i>  | 2.1                    | Cytoplasm           | other                             |
| TROAP                    | trophinin associated protein                                  | <i>TROAP</i>    | 2.1                    | Cytoplasm           | peptidase                         |
| ERII                     | exoribonuclease 1                                             | <i>Eri1</i>     | 2.1                    | Nucleus             | enzyme                            |
| CYTH3                    | cytohesin 3                                                   | <i>Cyth3</i>    | 2.1                    | Cytoplasm           | other                             |
| PLAC8                    | placenta associated 8                                         | <i>PLAC8</i>    | 2.1                    | Nucleus             | other                             |

|          |                                                           |                  |     |                     |                            |
|----------|-----------------------------------------------------------|------------------|-----|---------------------|----------------------------|
| RNF220   | ring finger protein 220                                   | <i>Rnf220</i>    | 2.0 | Cytoplasm           | enzyme                     |
| BANK1    | B cell scaffold protein with ankyrin repeats 1            | <i>BANK1</i>     | 2.0 | Extracellular Space | other                      |
| NAXD     | NAD(P)HX dehydratase                                      | <i>CARKD</i>     | 2.0 | Cytoplasm           | enzyme                     |
| CCR9     | C-C motif chemokine receptor 9                            | <i>CCR9</i>      | 2.0 | Plasma membrane     | G-protein coupled receptor |
| CENPQ    | centromere protein Q                                      | <i>Cenpq</i>     | 2.0 | Nucleus             | other                      |
| ASXL1    | ASXL transcriptional regulator 1                          | <i>Asxl1</i>     | 2.0 | Nucleus             | transcription regulator    |
| ENTPD7   | ectonucleoside triphosphate diphosphohydrolase 7          | <i>ENTPD7</i>    | 2.0 | Cytoplasm           | enzyme                     |
| NECAB2   | N-terminal EF-hand calcium binding protein 2              | <i>Necab2</i>    | 2.0 | Cytoplasm           | other                      |
| MAGEH1   | MAGE family member H1                                     | <i>MAGEH1</i>    | 2.0 | Cytoplasm           | other                      |
| ACADVL   | acyl-CoA dehydrogenase very long chain                    | <i>ACADVL</i>    | 2.0 | Cytoplasm           | enzyme                     |
| KIAA0753 | KIAA0753                                                  | <i>KIAA0753</i>  | 2.0 | Cytoplasm           | other                      |
| PDS5A    | PDS5 cohesin associated factor A                          | <i>PDS5A</i>     | 2.0 | Nucleus             | other                      |
| MEGF8    | multiple EGF like domains 8                               | <i>Megf8</i>     | 2.0 | Extracellular Space | other                      |
| PPP2CA   | protein phosphatase 2 catalytic subunit alpha             | <i>PPP2CA</i>    | 2.0 | Cytoplasm           | phosphatase                |
| ARFRP1   | ADP ribosylation factor related protein 1                 | <i>ARFRP1</i>    | 2.0 | Cytoplasm           | enzyme                     |
| EDEM1    | ER degradation enhancing alpha-mannosidase like protein 1 | <i>EDEM1</i>     | 1.9 | Cytoplasm           | enzyme                     |
| CARD9    | caspase recruitment domain family member 9                | <i>CARD9</i>     | 1.9 | Cytoplasm           | other                      |
| ATF2     | activating transcription factor 2                         | <i>Atf2</i>      | 1.9 | Nucleus             | transcription regulator    |
| MAPK4    | mitogen-activated protein kinase 4                        | <i>MAPK4</i>     | 1.9 | Cytoplasm           | kinase                     |
| UPB1     | beta-ureidopropionase 1                                   | <i>UPB1</i>      | 1.9 | Cytoplasm           | enzyme                     |
| WAS      | WASP actin nucleation promoting factor                    | <i>WAS</i>       | 1.9 | Cytoplasm           | other                      |
| PGD      | phosphogluconate dehydrogenase                            | <i>PGD</i>       | 1.9 | Cytoplasm           | enzyme                     |
| PUS7L    | pseudouridine synthase 7 like                             | <i>PUS7L</i>     | 1.9 | Other               | other                      |
| PDE3B    | phosphodiesterase 3B                                      | <i>PDE3B</i>     | 1.9 | Cytoplasm           | enzyme                     |
| SLIRP    | SRA stem-loop interacting RNA binding protein             | <i>C14orf156</i> | 1.9 | Cytoplasm           | other                      |
| TOB1     | transducer of ERBB2, 1                                    | <i>Tob1</i>      | 1.9 | Nucleus             | transcription regulator    |
| KLHL22   | kelch like family member 22                               | <i>Klhl22</i>    | 1.9 | Cytoplasm           | other                      |
| TBC1D7   | TBC1 domain family member 7                               | <i>TBC1D7</i>    | 1.9 | Cytoplasm           | other                      |
| CNOT10   | CCR4-NOT transcription complex subunit 10                 | <i>Cnot10</i>    | 1.9 | Cytoplasm           | other                      |
| CCDC59   | coiled-coil domain containing 59                          | <i>CCDC59</i>    | 1.9 | Nucleus             | other                      |
| IGSF8    | immunoglobulin superfamily member 8                       | <i>IGSF8</i>     | 1.9 | Plasma membrane     | other                      |
| PCYOX1   | prenylcysteine oxidase 1                                  | <i>PCYOX1</i>    | 1.9 | Cytoplasm           | enzyme                     |
| RAE1     | ribonucleic acid export 1                                 | <i>RAE1</i>      | 1.9 | Nucleus             | other                      |
| SH3KBP1  | SH3 domain containing kinase binding protein 1            | <i>Sh3kbp1</i>   | 1.9 | Cytoplasm           | other                      |
| BOC      | BOC cell adhesion associated, oncogene regulated          | <i>BOC</i>       | 1.9 | Plasma membrane     | other                      |
| PCID2    | PCI domain containing 2                                   | <i>PCID2</i>     | 1.9 | Nucleus             | transcription regulator    |
| RBL2     | RB transcriptional corepressor like 2                     | <i>RBL2</i>      | 1.9 | Nucleus             | other                      |
| ADGRL1   | adhesion G protein-coupled receptor L1                    | <i>LPHN1</i>     | 1.9 | Plasma membrane     | G-protein coupled receptor |
| TYROBP   | transmembrane immune signaling adaptor TYROBP             | <i>TYROBP</i>    | 1.9 | Plasma membrane     | transmembrane receptor     |
| ZSWIM8   | zinc finger SWIM-type containing 8                        | <i>KIAA0913</i>  | 1.9 | Extracellular Space | other                      |
| SLC39A4  | solute carrier family 39 member 4                         | <i>SLC39A4</i>   | 1.9 | Plasma membrane     | transporter                |
| ACTR6    | actin related protein 6                                   | <i>ACTR6</i>     | 1.8 | Nucleus             | transporter                |

|                   |                                                          |                 |     |                     |                         |
|-------------------|----------------------------------------------------------|-----------------|-----|---------------------|-------------------------|
| GRIA3             | glutamate ionotropic receptor AMPA type subunit 3        | <i>Gria3</i>    | 1.8 | Plasma membrane     | ion channel             |
| ZBTB9             | zinc finger and BTB domain containing 9                  | <i>Zbtb9</i>    | 1.8 | Nucleus             | other                   |
| ITSN2             | intersectin 2                                            | <i>Itsn2</i>    | 1.8 | Cytoplasm           | other                   |
| MACF1             | microtubule actin crosslinking factor 1                  | <i>MACF1</i>    | 1.8 | Cytoplasm           | other                   |
| MALT1             | MALT1 paracaspase                                        | <i>MALT1</i>    | 1.8 | Cytoplasm           | peptidase               |
| UNC45A            | unc-45 myosin chaperone A                                | <i>UNC45A</i>   | 1.8 | Plasma membrane     | other                   |
| DNAJB12           | DnaJ heat shock protein family (Hsp40) member B12        | <i>DNAJB12</i>  | 1.8 | Cytoplasm           | other                   |
| EBP               | EBP cholesterol delta-isomerase                          | <i>EBP</i>      | 1.8 | Cytoplasm           | enzyme                  |
| TFPI              | tissue factor pathway inhibitor                          | <i>TFPI</i>     | 1.8 | Extracellular Space | other                   |
| PKN1              | protein kinase N1                                        | <i>PKN1</i>     | 1.8 | Cytoplasm           | kinase                  |
| WDR33             | WD repeat domain 33                                      | <i>WDR33</i>    | 1.8 | Nucleus             | other                   |
| KBTBD4            | kelch repeat and BTB domain containing 4                 | <i>KBTBD4</i>   | 1.8 | Other               | other                   |
| SLC5A11           | solute carrier family 5 member 11                        | <i>SLC5A11</i>  | 1.8 | Plasma membrane     | transporter             |
| USP14             | ubiquitin specific peptidase 14                          | <i>USP14</i>    | 1.8 | Cytoplasm           | peptidase               |
| AMMECR1L          | AMMECR1 like                                             | <i>AMMECR1L</i> | 1.8 | Other               | other                   |
| KHK               | ketohehexokinase                                         | <i>Khk</i>      | 1.8 | Cytoplasm           | kinase                  |
| ATP10A            | ATPase phospholipid transporting 10A (putative)          | <i>ATP10A</i>   | 1.8 | Plasma membrane     | transporter             |
| CCDC138           | coiled-coil domain containing 138                        | <i>CCDC138</i>  | 1.8 | Other               | other                   |
| MYO18A            | myosin XVIII A                                           | <i>Myo18a</i>   | 1.8 | Cytoplasm           | other                   |
| CRTC2             | CREB regulated transcription coactivator 2               | <i>CRTC2</i>    | 1.8 | Nucleus             | other                   |
| AFP               | alpha fetoprotein                                        | <i>AFP</i>      | 1.8 | Extracellular Space | transporter             |
| ZNF768            | zinc finger protein 768                                  | <i>ZNF768</i>   | 1.8 | Other               | other                   |
| EIF2B2            | eukaryotic translation initiation factor 2B subunit beta | <i>EIF2B2</i>   | 1.8 | Cytoplasm           | translation regulator   |
| CORO7/CORO7-PAM16 | coronin 7                                                | <i>CORO7</i>    | 1.8 | Cytoplasm           | other                   |
| MINAR1            | membrane integral NOTCH2 associated receptor 1           | <i>KIAA1024</i> | 1.8 | Plasma membrane     | other                   |
| DACT1             | dishevelled binding antagonist of beta catenin 1         | <i>DACT1</i>    | 1.8 | Cytoplasm           | other                   |
| FBXL7             | F-box and leucine rich repeat protein 7                  | <i>FBXL7</i>    | 1.8 | Cytoplasm           | enzyme                  |
| CSN2              | casein beta                                              | <i>CSN2</i>     | 1.8 | Extracellular Space | kinase                  |
| MRPL45            | mitochondrial ribosomal protein L45                      | <i>MRPL45</i>   | 1.8 | Cytoplasm           | other                   |
| PPP1R12C          | protein phosphatase 1 regulatory subunit 12C             | <i>PPP1R12C</i> | 1.8 | Cytoplasm           | phosphatase             |
| ZFP62             | ZFP62 zinc finger protein                                | <i>ZFP62</i>    | 1.8 | Nucleus             | transcription regulator |
| PARPBP            | PARP1 binding protein                                    | <i>C12orf48</i> | 1.8 | Nucleus             | other                   |
| HSD17B1           | hydroxysteroid 17-beta dehydrogenase 1                   | <i>Hsd17b1</i>  | 1.8 | Cytoplasm           | enzyme                  |
| EML2              | EMAP like 2                                              | <i>Em12</i>     | 1.8 | Cytoplasm           | other                   |
| EXOC8             | exocyst complex component 8                              | <i>Exoc8</i>    | 1.8 | Plasma membrane     | other                   |
| SYNE1             | spectrin repeat containing nuclear envelope protein 1    | <i>SYNE1</i>    | 1.8 | Nucleus             | other                   |
| ME1               | malic enzyme 1                                           | <i>ME1</i>      | 1.8 | Cytoplasm           | enzyme                  |
| RGS22             | regulator of G protein signaling 22                      | <i>RGS22</i>    | 1.7 | Cytoplasm           | other                   |
| ZSCAN21           | zinc finger and SCAN domain containing 21                | <i>ZSCAN21</i>  | 1.7 | Nucleus             | transcription regulator |
| NAXE              | NAD(P)HX epimerase                                       | <i>APOA1BP</i>  | 1.7 | Extracellular Space | enzyme                  |
| USP34             | ubiquitin specific peptidase 34                          | <i>USP34</i>    | 1.7 | Extracellular Space | peptidase               |
| TCEAL4            | transcription elongation factor A like 4                 | <i>TCEAL4</i>   | 1.7 | Other               | other                   |

|                         |                                                                      |                |     |                     |                         |
|-------------------------|----------------------------------------------------------------------|----------------|-----|---------------------|-------------------------|
| LSM5                    | LSM5 homologue, U6 small nuclear RNA and mRNA degradation associated | <i>LSM5</i>    | 1.7 | Cytoplasm           | other                   |
| GOLM2                   | golgi membrane protein 2                                             | <i>CASC4</i>   | 1.7 | Cytoplasm           | other                   |
| COL9A2                  | collagen type IX alpha 2 chain                                       | <i>COL9A2</i>  | 1.7 | Extracellular Space | other                   |
| HDLBP                   | high density lipoprotein binding protein                             | <i>HDLBP</i>   | 1.7 | Nucleus             | transporter             |
| ZNF503                  | zinc finger protein 503                                              | <i>ZNF503</i>  | 1.7 | Nucleus             | other                   |
| CTRC                    | chymotrypsin C                                                       | <i>CTRC</i>    | 1.7 | Extracellular Space | peptidase               |
| BCKDHA                  | branched chain keto acid dehydrogenase E1 subunit alpha              | <i>BCKDHA</i>  | 1.7 | Cytoplasm           | enzyme                  |
| TMEM177                 | transmembrane protein 177                                            | <i>Tmem177</i> | 1.7 | Cytoplasm           | other                   |
| CIART                   | circadian associated repressor of transcription                      | <i>Clorf51</i> | 1.7 | Nucleus             | other                   |
| AK2                     | adenylate kinase 2                                                   | <i>Ak2</i>     | 1.7 | Cytoplasm           | kinase                  |
| CNTN6                   | contactin 6                                                          | <i>CNTN6</i>   | 1.7 | Plasma membrane     | enzyme                  |
| FABP4                   | fatty acid binding protein 4                                         | <i>FABP4</i>   | 1.7 | Cytoplasm           | transporter             |
| AMMECR1                 | AMMECR nuclear protein 1                                             | <i>AMMECR1</i> | 1.7 | Nucleus             | other                   |
| ZNF821                  | zinc finger protein 821                                              | <i>ZNF821</i>  | 1.7 | Other               | other                   |
| AVEN                    | apoptosis and caspase activation inhibitor                           | <i>AVEN</i>    | 1.7 | Nucleus             | other                   |
| LLPH                    | LLP homologue, long-term synaptic facilitation factor                | <i>Lph</i>     | 1.7 | Extracellular Space | other                   |
| PXN                     | paxillin                                                             | <i>PXN</i>     | 1.7 | Cytoplasm           | other                   |
| ATRNL1                  | attractin like 1                                                     | <i>ATRNL1</i>  | 1.7 | Other               | other                   |
| ZNF281                  | zinc finger protein 281                                              | <i>ZNF281</i>  | 1.7 | Nucleus             | transcription regulator |
| LTB                     | lymphotoxin beta                                                     | <i>LTB</i>     | 1.7 | Extracellular Space | cytokine                |
| NTM                     | neurotrimin                                                          | <i>Ntm</i>     | 1.7 | Plasma membrane     | other                   |
| CALM1 (includes others) | calmodulin 1                                                         | <i>CALM1</i>   | 1.7 | Cytoplasm           | other                   |
| XRN2                    | 5'-3' exoribonuclease 2                                              | <i>XRN2</i>    | 1.7 | Nucleus             | enzyme                  |
| Reg3a                   | regenerating islet-derived 3 alpha                                   | <i>Reg3a</i>   | 1.7 | Extracellular Space | other                   |
| B3GNT9                  | UDP-GlcNAc:betaGal beta-1,3-N-acetylglucosaminyltransferase 9        | <i>B3gnt9</i>  | 1.7 | Cytoplasm           | enzyme                  |
| DDR1                    | discoidin domain receptor tyrosine kinase 1                          | <i>DDR1</i>    | 1.7 | Plasma membrane     | kinase                  |
| TRPV2                   | transient receptor potential cation channel subfamily V member 2     | <i>TRPV2</i>   | 1.7 | Plasma membrane     | ion channel             |
| MEOX2                   | mesenchyme homeobox 2                                                | <i>MEOX2</i>   | 1.7 | Nucleus             | transcription regulator |
| USP21                   | ubiquitin specific peptidase 21                                      | <i>USP21</i>   | 1.7 | Cytoplasm           | peptidase               |
| WIPF2                   | WAS/WASL interacting protein family member 2                         | <i>WIPF2</i>   | 1.7 | Cytoplasm           | other                   |
| KCNN3                   | potassium calcium-activated channel subfamily N member 3             | <i>KCNN3</i>   | 1.7 | Plasma membrane     | ion channel             |
| GMPS                    | guanine monophosphate synthase                                       | <i>GMPS</i>    | 1.7 | Nucleus             | enzyme                  |
| RPL27                   | ribosomal protein L27                                                | <i>Rpl27</i>   | 1.7 | Cytoplasm           | other                   |
| ELOVL1                  | ELOVL fatty acid elongase 1                                          | <i>Elov11</i>  | 1.7 | Cytoplasm           | enzyme                  |
| TMEM50A                 | transmembrane protein 50A                                            | <i>Tmem50a</i> | 1.7 | Plasma membrane     | other                   |
| RAP1B                   | RAP1B, member of RAS oncogene family                                 | <i>Rap1b</i>   | 1.7 | Cytoplasm           | enzyme                  |
| FLRT1                   | fibronectin leucine rich transmembrane protein 1                     | <i>FLRT1</i>   | 1.7 | Plasma membrane     | other                   |
| UBL5                    | ubiquitin like 5                                                     | <i>UBL5</i>    | 1.7 | Cytoplasm           | other                   |
| MED21                   | mediator complex subunit 21                                          | <i>MED21</i>   | 1.7 | Nucleus             | transcription regulator |
| RSBN1                   | round spermatid basic protein 1                                      | <i>RSBN1</i>   | 1.7 | Nucleus             | other                   |
| IGF1R                   | insulin like growth factor 1 receptor                                | <i>IGF1R</i>   | 1.7 | Plasma membrane     | transmembrane receptor  |

|           |                                                            |                  |     |                     |                         |
|-----------|------------------------------------------------------------|------------------|-----|---------------------|-------------------------|
| HNRNPK    | heterogeneous nuclear ribonucleoprotein K                  | <i>Hnrnpk</i>    | 1.7 | Nucleus             | other                   |
| KIF22     | kinesin family member 22                                   | <i>Kif22</i>     | 1.7 | Nucleus             | other                   |
| EDRF1     | erythroid differentiation regulatory factor 1              | <i>C10orf137</i> | 1.7 | Other               | other                   |
| EGFLAM    | EGF like, fibronectin type III and laminin G domains       | <i>EGFLAM</i>    | 1.7 | Extracellular Space | other                   |
| TMEM256   | transmembrane protein 256                                  | <i>C17orf61</i>  | 1.7 | Cytoplasm           | other                   |
| CIAO2B    | cytosolic iron-sulfur assembly component 2B                | <i>FAM96B</i>    | 1.7 | Cytoplasm           | other                   |
| WIPF1     | WAS/WASL interacting protein family member 1               | <i>WIPF1</i>     | 1.7 | Cytoplasm           | other                   |
| ZBTB10    | zinc finger and BTB domain containing 10                   | <i>ZBTB10</i>    | 1.7 | Nucleus             | transcription regulator |
| PHB       | prohibitin                                                 | <i>Phb</i>       | 1.7 | Nucleus             | transcription regulator |
| DST       | dystonin                                                   | <i>DST</i>       | 1.7 | Plasma membrane     | other                   |
| NCF2      | neutrophil cytosolic factor 2                              | <i>Ncf2</i>      | 1.6 | Cytoplasm           | enzyme                  |
| PRODH2    | proline dehydrogenase 2                                    | <i>PRODH2</i>    | 1.6 | Cytoplasm           | enzyme                  |
| SELENOP   | selenoprotein P                                            | <i>SEPP1</i>     | 1.6 | Extracellular Space | other                   |
| USP11     | ubiquitin specific peptidase 11                            | <i>USP11</i>     | 1.6 | Nucleus             | peptidase               |
| Ptprd     | protein tyrosine phosphatase, receptor type, D             | <i>Ptprd</i>     | 1.6 | Plasma membrane     | phosphatase             |
| DDX19A    | DEAD-box helicase 19A                                      | <i>DDX19A</i>    | 1.6 | Nucleus             | enzyme                  |
| SIL1      | SIL1 nucleotide exchange factor                            | <i>SIL1</i>      | 1.6 | Cytoplasm           | transporter             |
| DOT1L     | DOT1 like histone lysine methyltransferase                 | <i>Dot1l</i>     | 1.6 | Nucleus             | phosphatase             |
| RYK       | receptor like tyrosine kinase                              | <i>RYK</i>       | 1.6 | Plasma membrane     | kinase                  |
| TRAF4     | TNF receptor associated factor 4                           | <i>TRAF4</i>     | 1.6 | Cytoplasm           | other                   |
| TFE3      | transcription factor binding to IGHM enhancer 3            | <i>TFE3</i>      | 1.6 | Nucleus             | transcription regulator |
| C1QA      | complement C1q A chain                                     | <i>C1qa</i>      | 1.6 | Extracellular Space | other                   |
| WNT2B     | Wnt family member 2B                                       | <i>WNT2B</i>     | 1.6 | Extracellular Space | other                   |
| UXT       | ubiquitously expressed prefoldin like chaperone            | <i>UXT</i>       | 1.6 | Cytoplasm           | transcription regulator |
| CYYR1     | cysteine and tyrosine rich 1                               | <i>CYYR1</i>     | 1.6 | Other               | other                   |
| SCP2      | sterol carrier protein 2                                   | <i>SCP2</i>      | 1.6 | Cytoplasm           | transporter             |
| FERMT2    | FERM domain containing kindlin 2                           | <i>Fermt2</i>    | 1.6 | Cytoplasm           | other                   |
| MAPRE2    | microtubule associated protein RP/EB family member 2       | <i>MAPRE2</i>    | 1.6 | Cytoplasm           | other                   |
| ERCC1     | ERCC excision repair 1, endonuclease non-catalytic subunit | <i>Ercc1</i>     | 1.6 | Nucleus             | enzyme                  |
| DNASE2    | deoxyribonuclease 2, lysosomal                             | <i>DNASE2</i>    | 1.6 | Cytoplasm           | enzyme                  |
| CD68      | CD68 molecule                                              | <i>CD68</i>      | 1.6 | Plasma membrane     | other                   |
| EIF4A1    | eukaryotic translation initiation factor 4A1               | <i>EIF4A1</i>    | 1.6 | Cytoplasm           | translation regulator   |
| DLST      | dihydrolipoamide S-succinyltransferase                     | <i>DLST</i>      | 1.6 | Cytoplasm           | enzyme                  |
| GSE1      | Gse1 coiled-coil protein                                   | <i>KIAA0182</i>  | 1.6 | Extracellular Space | other                   |
| MYRIP     | myosin VIIA and Rab interacting protein                    | <i>MYRIP</i>     | 1.6 | Cytoplasm           | other                   |
| TCF21     | transcription factor 21                                    | <i>Tcf21</i>     | 1.6 | Nucleus             | transcription regulator |
| AURKA     | aurora kinase A                                            | <i>AURKA</i>     | 1.6 | Nucleus             | kinase                  |
| HMG3      | high mobility group nucleosomal binding domain 3           | <i>HMG3</i>      | 1.6 | Nucleus             | other                   |
| SMN1/SMN2 | survival of motor neuron 1, telomeric                      | <i>Smn1</i>      | 1.6 | Nucleus             | other                   |
| TIGD1     | tigger transposable element derived 1                      | <i>TIGD1</i>     | 1.6 | Other               | other                   |

|         |                                                                               |                |     |                     |                         |
|---------|-------------------------------------------------------------------------------|----------------|-----|---------------------|-------------------------|
| CITED1  | Cbp/p3 interacting transactivator with Glu/Asp rich carboxy-terminal domain 1 | <i>CITED1</i>  | 1.6 | Nucleus             | transcription regulator |
| DUSP1   | dual specificity phosphatase 1                                                | <i>DUSP1</i>   | 1.6 | Nucleus             | phosphatase             |
| RNF8    | ring finger protein 8                                                         | <i>Rnf8</i>    | 1.6 | Nucleus             | enzyme                  |
| CHRAC1  | chromatin accessibility complex subunit 1                                     | <i>Chrac1</i>  | 1.6 | Nucleus             | enzyme                  |
| DKK2    | dickkopf WNT signaling pathway inhibitor 2                                    | <i>DKK2</i>    | 1.6 | Extracellular Space | other                   |
| B3GNT2  | UDP-GlcNAc:betaGal beta-1,3-N-acetylglucosaminyltransferase 2                 | <i>B3GNT2</i>  | 1.6 | Cytoplasm           | enzyme                  |
| DEF6    | DEF6 guanine nucleotide exchange factor                                       | <i>Def6</i>    | 1.6 | Extracellular Space | other                   |
| ALDH3B2 | aldehyde dehydrogenase 3 family member B2                                     | <i>ALDH3B2</i> | 1.6 | Cytoplasm           | enzyme                  |
| HEXB    | hexosaminidase subunit beta                                                   | <i>Hexb</i>    | 1.6 | Cytoplasm           | enzyme                  |
| CA2     | carbonic anhydrase 2                                                          | <i>CA2</i>     | 1.6 | Cytoplasm           | enzyme                  |
| PLCL1   | phospholipase C like 1 (inactive)                                             | <i>PLCL1</i>   | 1.6 | Cytoplasm           | enzyme                  |
| HMBS    | hydroxymethylbilane synthase                                                  | <i>HMBS</i>    | 1.6 | Cytoplasm           | enzyme                  |
| BCAS3   | BCAS3 microtubule associated cell migration factor                            | <i>BCAS3</i>   | 1.6 | Nucleus             | other                   |
| NUTF2   | nuclear transport factor 2                                                    | <i>NUTF2</i>   | 1.6 | Nucleus             | other                   |
| TMC8    | transmembrane channel like 8                                                  | <i>TMC8</i>    | 1.6 | Cytoplasm           | other                   |
| ATP2C2  | ATPase secretory pathway Ca2+ transporting 2                                  | <i>ATP2C2</i>  | 1.6 | Cytoplasm           | enzyme                  |
| ZNF35   | zinc finger protein 35                                                        | <i>ZNF35</i>   | 1.6 | Nucleus             | transcription regulator |
| PSMB10  | proteasome 20S subunit beta 10                                                | <i>PSMB10</i>  | 1.6 | Cytoplasm           | peptidase               |
| VPS39   | VPS39 subunit of HOPS complex                                                 | <i>VPS39</i>   | 1.6 | Cytoplasm           | transporter             |
| NCAPG2  | non-SMC condensin II complex subunit G2                                       | <i>NCAPG2</i>  | 1.6 | Nucleus             | other                   |
| VCAM1   | vascular cell adhesion molecule 1                                             | <i>Vcam1</i>   | 1.6 | Plasma membrane     | transmembrane receptor  |
| BRPF1   | bromodomain and PHD finger containing 1                                       | <i>BRPF1</i>   | 1.6 | Nucleus             | transporter             |
| PLEKHG2 | pleckstrin homologue and RhoGEF domain containing G2                          | <i>Plekhg2</i> | 1.6 | Cytoplasm           | other                   |
| SLC30A6 | solute carrier family 30 member 6                                             | <i>SLC30A6</i> | 1.6 | Cytoplasm           | transporter             |
| FLOT2   | flotillin 2                                                                   | <i>FLOT2</i>   | 1.6 | Plasma membrane     | other                   |
| PARVG   | parvin gamma                                                                  | <i>PARVG</i>   | 1.6 | Cytoplasm           | other                   |
| ZNF217  | zinc finger protein 217                                                       | <i>ZNF217</i>  | 1.6 | Nucleus             | transcription regulator |
| TUBGCP5 | tubulin gamma complex associated protein 5                                    | <i>TUBGCP5</i> | 1.6 | Cytoplasm           | other                   |
| GRID1   | glutamate ionotropic receptor delta type subunit 1                            | <i>GRID1</i>   | 1.6 | Plasma membrane     | ion channel             |
| PKNOX1  | PBX/knotted 1 homeobox 1                                                      | <i>Pknox1</i>  | 1.6 | Nucleus             | transcription regulator |
| LRRC36  | leucine rich repeat containing 36                                             | <i>LRRC36</i>  | 1.6 | Other               | other                   |
| BCL2L2  | BCL2 like 2                                                                   | <i>Bcl2l2</i>  | 1.6 | Cytoplasm           | other                   |
| LGALS4  | galectin 4                                                                    | <i>Lgals4</i>  | 1.6 | Extracellular Space | other                   |
| DDX41   | DEAD-box helicase 41                                                          | <i>DDX41</i>   | 1.6 | Nucleus             | enzyme                  |
| CD1D    | CD1d molecule                                                                 | <i>CD1D</i>    | 1.6 | Plasma membrane     | other                   |
| LAP3    | leucine aminopeptidase 3                                                      | <i>LAP3</i>    | 1.6 | Cytoplasm           | peptidase               |
| MARK2   | microtubule affinity regulating kinase 2                                      | <i>MARK2</i>   | 1.6 | Cytoplasm           | kinase                  |
| AP4M1   | adaptor related protein complex 4 subunit mu 1                                | <i>AP4M1</i>   | 1.6 | Cytoplasm           | other                   |
| AMIGO2  | adhesion molecule with Ig like domain 2                                       | <i>AMIGO2</i>  | 1.6 | Plasma membrane     | other                   |
| FAH     | fumarylacetoacetate hydrolase                                                 | <i>FAH</i>     | 1.6 | Cytoplasm           | enzyme                  |
| MEF2B   | myocyte enhancer factor 2B                                                    | <i>MEF2B</i>   | 1.6 | Nucleus             | transcription regulator |

|         |                                                                |                 |     |                     |                         |
|---------|----------------------------------------------------------------|-----------------|-----|---------------------|-------------------------|
| CCDC51  | coiled-coil domain containing 51                               | <i>Ccdc51</i>   | 1.6 | Cytoplasm           | transporter             |
| CBX8    | chromobox 8                                                    | <i>Cbx8</i>     | 1.6 | Nucleus             | other                   |
| ARL14EP | ADP ribosylation factor like GTPase 14 effector protein        | <i>C11orf46</i> | 1.6 | Other               | other                   |
| LRRC59  | leucine rich repeat containing 59                              | <i>LRRC59</i>   | 1.5 | Cytoplasm           | other                   |
| WDR91   | WD repeat domain 91                                            | <i>WDR91</i>    | 1.5 | Cytoplasm           | other                   |
| RMI1    | RecQ mediated genome instability 1                             | <i>Rmi1</i>     | 1.5 | Nucleus             | other                   |
| EXOSC10 | exosome component 10                                           | <i>EXOSC10</i>  | 1.5 | Nucleus             | kinase                  |
| TEX30   | testis expressed 30                                            | <i>C13orf27</i> | 1.5 | Other               | other                   |
| SEMA6D  | semaphorin 6D                                                  | <i>SEMA6D</i>   | 1.5 | Plasma membrane     | other                   |
| GALNT14 | polypeptide N-acetylgalactosaminyl transferase 14              | <i>Galnt14</i>  | 1.5 | Cytoplasm           | enzyme                  |
| VAMP1   | vesicle associated membrane protein 1                          | <i>VAMP1</i>    | 1.5 | Cytoplasm           | transporter             |
| PTPRB   | protein tyrosine phosphatase receptor type B                   | <i>PTPRB</i>    | 1.5 | Plasma membrane     | phosphatase             |
| ALG10   | ALG10 alpha-1,2-glucosyltransferase                            | <i>ALG10</i>    | 1.5 | Cytoplasm           | enzyme                  |
| MARCO   | macrophage receptor with collagenous structure                 | <i>MARCO</i>    | 1.5 | Plasma membrane     | transmembrane receptor  |
| GRB7    | growth factor receptor bound protein 7                         | <i>Grb7</i>     | 1.5 | Plasma membrane     | other                   |
| AIF1    | allograft inflammatory factor 1                                | <i>Aif1</i>     | 1.5 | Nucleus             | other                   |
| MAML3   | mastermind like transcriptional coactivator 3                  | <i>MAML3</i>    | 1.5 | Nucleus             | transcription regulator |
| TCTN1   | tectonic family member 1                                       | <i>TCTN1</i>    | 1.5 | Extracellular Space | other                   |
| ARHGEF9 | Cdc42 guanine nucleotide exchange factor 9                     | <i>ARHGEF9</i>  | 1.5 | Cytoplasm           | other                   |
| ATP6V1F | ATPase H+ transporting V1 subunit F                            | <i>ATP6V1F</i>  | 1.5 | Cytoplasm           | enzyme                  |
| AGPAT3  | 1-acylglycerol-3-phosphate O-acyltransferase 3                 | <i>AGPAT3</i>   | 1.5 | Cytoplasm           | enzyme                  |
| SNX1    | sorting nexin 1                                                | <i>SNX1</i>     | 1.5 | Cytoplasm           | transporter             |
| MTBP    | MDM2 binding protein                                           | <i>MTBP</i>     | 1.5 | Cytoplasm           | other                   |
| BAZ1A   | bromodomain adjacent to zinc finger domain 1A                  | <i>BAZ1A</i>    | 1.5 | Nucleus             | other                   |
| PDLIM1  | PDZ and LIM domain 1                                           | <i>PDLIM1</i>   | 1.5 | Cytoplasm           | transcription regulator |
| FITM1   | fat storage inducing transmembrane protein 1                   | <i>FITM1</i>    | 1.5 | Extracellular Space | other                   |
| LIMA1   | LIM domain and actin binding 1                                 | <i>LIMA1</i>    | 1.5 | Cytoplasm           | other                   |
| PHF23   | PHD finger protein 23                                          | <i>Phf23</i>    | 1.5 | Nucleus             | other                   |
| VPS35   | VPS35 retromer complex component                               | <i>Vps35</i>    | 1.5 | Cytoplasm           | transporter             |
| CILP    | cartilage intermediate layer protein                           | <i>CILP</i>     | 1.5 | Extracellular Space | phosphatase             |
| B4GALT5 | beta-1,4-galactosyltransferase 5                               | <i>B4galt5</i>  | 1.5 | Cytoplasm           | enzyme                  |
| RCL1    | RNA terminal phosphate cyclase like 1                          | <i>RCL1</i>     | 1.5 | Nucleus             | enzyme                  |
| LETMD1  | LETM1 domain containing 1                                      | <i>LETMD1</i>   | 1.5 | Plasma membrane     | other                   |
| HIF3A   | hypoxia inducible factor 3 subunit alpha                       | <i>HIF3A</i>    | 1.5 | Nucleus             | transcription regulator |
| PSMC6   | proteasome 26S subunit, ATPase 6                               | <i>Psmc6</i>    | 1.5 | Nucleus             | peptidase               |
| CD2     | CD2 molecule                                                   | <i>Cd2</i>      | 1.5 | Plasma membrane     | other                   |
| MYO9A   | myosin IXA                                                     | <i>MYO9A</i>    | 1.5 | Cytoplasm           | enzyme                  |
| PIGR    | polymeric immunoglobulin receptor                              | <i>PIGR</i>     | 1.5 | Plasma membrane     | transporter             |
| PLAGL1  | PLAG1 like zinc finger 1                                       | <i>PLAGL1</i>   | 1.5 | Nucleus             | transcription regulator |
| CTSA    | cathepsin A                                                    | <i>CTSA</i>     | 1.5 | Cytoplasm           | peptidase               |
| TOPORS  | TOP1 binding arginine/serine rich protein, E3 ubiquitin ligase | <i>Topors</i>   | 1.5 | Nucleus             | enzyme                  |
| CH25H   | cholesterol 25-hydroxylase                                     | <i>CH25H</i>    | 1.5 | Cytoplasm           | enzyme                  |

|          |                                                                  |                 |     |                     |                            |
|----------|------------------------------------------------------------------|-----------------|-----|---------------------|----------------------------|
| TMEM9    | transmembrane protein 9                                          | <i>Tmem9</i>    | 1.5 | Cytoplasm           | other                      |
| POLD4    | DNA polymerase delta 4, accessory subunit                        | <i>POLD4</i>    | 1.5 | Nucleus             | enzyme                     |
| PARP9    | poly(ADP-ribose) polymerase family member 9                      | <i>PARP9</i>    | 1.5 | Nucleus             | enzyme                     |
| CCDC92   | coiled-coil domain containing 92                                 | <i>CCDC92</i>   | 1.5 | Cytoplasm           | other                      |
| NRXN1    | neurexin 1                                                       | <i>NRXN1</i>    | 1.5 | Plasma membrane     | transporter                |
| COL4A1   | collagen type IV alpha 1 chain                                   | <i>Col4a1</i>   | 1.5 | Extracellular Space | other                      |
| PARD6A   | par-6 family cell polarity regulator alpha                       | <i>PARD6A</i>   | 1.5 | Plasma membrane     | other                      |
| CD44     | CD44 molecule (Indian blood group)                               | <i>CD44</i>     | 1.5 | Plasma membrane     | other                      |
| GNB1     | G protein subunit beta 1                                         | <i>GNB1</i>     | 1.5 | Plasma membrane     | enzyme                     |
| ADGRE3   | adhesion G protein-coupled receptor E3                           | <i>EMR3</i>     | 1.5 | Plasma membrane     | G-protein coupled receptor |
| LACTB2   | lactamase beta 2                                                 | <i>LACTB2</i>   | 1.5 | Cytoplasm           | enzyme                     |
| FBXW9    | F-box and WD repeat domain containing 9                          | <i>FBXW9</i>    | 1.5 | Cytoplasm           | other                      |
| CYP1A1   | cytochrome P450 family 1 subfamily A member 1                    | <i>CYP1A1</i>   | 1.5 | Cytoplasm           | enzyme                     |
| HEY2     | hes related family bHLH transcription factor with YRPW motif 2   | <i>HEY2</i>     | 1.5 | Nucleus             | transcription regulator    |
| TRPC1    | transient receptor potential cation channel subfamily C member 1 | <i>Trpc1</i>    | 1.5 | Plasma membrane     | ion channel                |
| HIGD1A   | HIG1 hypoxia inducible domain family member 1A                   | <i>HIGD1A</i>   | 1.5 | Cytoplasm           | other                      |
| SF3B2    | splicing factor 3b subunit 2                                     | <i>SF3B2</i>    | 1.5 | Nucleus             | other                      |
| PPP1R21  | protein phosphatase 1 regulatory subunit 21                      | <i>KLRAQ1</i>   | 1.5 | Other               | other                      |
| CPT1B    | carnitine palmitoyltransferase 1B                                | <i>Cpt1b</i>    | 1.5 | Cytoplasm           | enzyme                     |
| PRAF2    | PRA1 domain family member 2                                      | <i>PRAF2</i>    | 1.5 | Other               | other                      |
| SOCS5    | suppressor of cytokine signaling 5                               | <i>SOCS5</i>    | 1.5 | Extracellular Space | cytokine                   |
| PSMD10   | proteasome 26S subunit, non-ATPase 10                            | <i>PSMD10</i>   | 1.5 | Cytoplasm           | transcription regulator    |
| WWC1     | WW and C2 domain containing 1                                    | <i>WWC1</i>     | 1.5 | Cytoplasm           | transcription regulator    |
| DCUN1D1  | defective in cullin neddylation 1 domain containing 1            | <i>DCUN1D1</i>  | 1.5 | Nucleus             | other                      |
| SLC27A5  | solute carrier family 27 member 5                                | <i>Slc27a5</i>  | 1.5 | Cytoplasm           | transporter                |
| BCL3     | BCL3 transcription coactivator                                   | <i>Bcl3</i>     | 1.5 | Nucleus             | transcription regulator    |
| RAB17    | RAB17, member RAS oncogene family                                | <i>RAB17</i>    | 1.5 | Cytoplasm           | enzyme                     |
| ACO2     | aconitase 2                                                      | <i>ACO2</i>     | 1.5 | Cytoplasm           | enzyme                     |
| ZBTB16   | zinc finger and BTB domain containing 16                         | <i>ZBTB16</i>   | 1.5 | Nucleus             | transcription regulator    |
| SERPINE2 | serpin family E member 2                                         | <i>SERPINE2</i> | 1.5 | Extracellular Space | other                      |
| SYNJ1    | synaptojanin 1                                                   | <i>SYNJ1</i>    | 1.5 | Cytoplasm           | phosphatase                |
| PEX2     | peroxisomal biogenesis factor 2                                  | <i>PEX2</i>     | 1.5 | Cytoplasm           | other                      |
| TIMM8A   | translocase of inner mitochondrial membrane 8A                   | <i>TIMM8A</i>   | 1.5 | Cytoplasm           | transporter                |
| PAPOLG   | poly(A) polymerase gamma                                         | <i>PAPOLG</i>   | 1.5 | Nucleus             | enzyme                     |
| TIGD3    | tigger transposable element derived 3                            | <i>Tigd3</i>    | 1.5 | Other               | other                      |
| SPPL2B   | signal peptide peptidase like 2B                                 | <i>SPPL2B</i>   | 1.4 | Plasma membrane     | peptidase                  |
| RSRC2    | arginine and serine rich coiled-coil 2                           | <i>RSRC2</i>    | 1.4 | Other               | other                      |
| DNAJB5   | DnaJ heat shock protein family (Hsp40) member B5                 | <i>DNAJB5</i>   | 1.4 | Cytoplasm           | other                      |
| MOV10    | Mov10 RISC complex RNA helicase                                  | <i>MOV10</i>    | 1.4 | Nucleus             | enzyme                     |



|          |                                                             |                  |     |                     |                                   |
|----------|-------------------------------------------------------------|------------------|-----|---------------------|-----------------------------------|
| SIA11    | S1 calcium binding protein A11                              | <i>SIA11</i>     | 1.4 | Cytoplasm           | other                             |
| TMED3    | transmembrane p24 trafficking protein 3                     | <i>TMED3</i>     | 1.4 | Cytoplasm           | transporter                       |
| RORC     | RAR related orphan receptor C                               | <i>Rorc</i>      | 1.4 | Nucleus             | ligand-dependent nuclear receptor |
| STAT3    | signal transducer and activator of transcription 3          | <i>Stat3</i>     | 1.4 | Nucleus             | transcription regulator           |
| IGFBPL1  | insulin like growth factor binding protein like 1           | <i>Igfbpl1</i>   | 1.4 | Extracellular Space | other                             |
| SMS      | spermine synthase                                           | <i>Sms</i>       | 1.4 | Cytoplasm           | enzyme                            |
| LARP6    | La ribonucleoprotein 6, translational regulator             | <i>LARP6</i>     | 1.4 | Cytoplasm           | other                             |
| ST8SIA1  | ST8 alpha-N-acetylneuraminide alpha-2,8-sialyltransferase 1 | <i>ST8SIA1</i>   | 1.4 | Cytoplasm           | enzyme                            |
| CELSR2   | cadherin EGF LAG seven-pass G-type receptor 2               | <i>CELSR2</i>    | 1.4 | Plasma membrane     | G-protein coupled receptor        |
| SARNP    | SAP domain containing ribonucleoprotein                     | <i>SARNP</i>     | 1.4 | Nucleus             | transcription regulator           |
| LOXL4    | lysyl oxidase like 4                                        | <i>Loxl4</i>     | 1.4 | Extracellular Space | enzyme                            |
| BPIFB1   | BPI fold containing family B member 1                       | <i>C20orf114</i> | 1.4 | Extracellular Space | other                             |
| MAN1C1   | mannosidase alpha class 1C member 1                         | <i>MAN1C1</i>    | 1.4 | Cytoplasm           | enzyme                            |
| MYCN     | MYCN proto-oncogene, bHLH transcription factor              | <i>MYCN</i>      | 1.4 | Nucleus             | transcription regulator           |
| LCK      | LCK proto-oncogene, Src family tyrosine kinase              | <i>LCK</i>       | 1.4 | Cytoplasm           | kinase                            |
| DVL3     | dishevelled segment polarity protein 3                      | <i>DVL3</i>      | 1.4 | Cytoplasm           | other                             |
| TCF4     | transcription factor 4                                      | <i>TCF4</i>      | 1.4 | Nucleus             | transcription regulator           |
| NUFIP1   | nuclear FMR1 interacting protein 1                          | <i>NUFIP1</i>    | 1.4 | Nucleus             | other                             |
| PGLYRP1  | peptidoglycan recognition protein 1                         | <i>Pglyrp1</i>   | 1.4 | Plasma membrane     | transmembrane receptor            |
| BCAM     | basal cell adhesion molecule (Lutheran blood group)         | <i>BCAM</i>      | 1.4 | Plasma membrane     | transmembrane receptor            |
| TMEM120A | transmembrane protein 120A                                  | <i>TMEM120A</i>  | 1.4 | Plasma membrane     | ion channel                       |
| Cdc42    | cell division cycle 42                                      | <i>Cdc42</i>     | 1.4 | Plasma membrane     | enzyme                            |
| RBFOX2   | RNA binding fox-1 homologue 2                               | <i>RBM9</i>      | 1.4 | Nucleus             | transcription regulator           |
| SLC7A6   | solute carrier family 7 member 6                            | <i>SLC7A6</i>    | 1.4 | Plasma membrane     | transporter                       |
| MRM1     | mitochondrial rRNA methyltransferase 1                      | <i>MRM1</i>      | 1.4 | Cytoplasm           | enzyme                            |
| CCNK     | cyclin K                                                    | <i>CCNK</i>      | 1.4 | Nucleus             | kinase                            |
| CDADC1   | cytidine and dCMP deaminase domain containing 1             | <i>CDADC1</i>    | 1.4 | Other               | kinase                            |
| NOL7     | nucleolar protein 7                                         | <i>NOL7</i>      | 1.4 | Nucleus             | other                             |
| DNAJC17  | DnaJ heat shock protein family (Hsp40) member C17           | <i>DNAJC17</i>   | 1.4 | Other               | other                             |
| XRCC4    | X-ray repair cross complementing 4                          | <i>Xrcc4</i>     | 1.4 | Nucleus             | enzyme                            |
| NOA1     | nitric oxide associated 1                                   | <i>C4orf14</i>   | 1.4 | Cytoplasm           | other                             |
| CSK      | C-terminal Src kinase                                       | <i>CSK</i>       | 1.4 | Cytoplasm           | kinase                            |
| DNAJC7   | DnaJ heat shock protein family (Hsp40) member C7            | <i>DNAJC7</i>    | 1.4 | Cytoplasm           | other                             |
| SERPINB8 | serpin family B member 8                                    | <i>SERPINB8</i>  | 1.4 | Cytoplasm           | other                             |
| NBAS     | NBAS subunit of NRZ tethering complex                       | <i>NBAS</i>      | 1.4 | Nucleus             | other                             |
| JAGN1    | jagunal homologue 1                                         | <i>JAGN1</i>     | 1.4 | Cytoplasm           | other                             |
| CENPV    | centromere protein V                                        | <i>CENPV</i>     | 1.4 | Nucleus             | other                             |
| ADAM23   | ADAM metallopeptidase domain 23                             | <i>ADAM23</i>    | 1.4 | Plasma membrane     | peptidase                         |
| CCN2     | cellular communication network factor 2                     | <i>CTGF</i>      | 1.4 | Extracellular Space | growth factor                     |
| LYVE1    | lymphatic vessel endothelial hyaluronan receptor 1          | <i>LYVE1</i>     | 1.4 | Plasma membrane     | transmembrane receptor            |

|          |                                                                         |                 |     |                     |                            |
|----------|-------------------------------------------------------------------------|-----------------|-----|---------------------|----------------------------|
| PIK3C2B  | phosphatidylinositol-4-phosphate 3-kinase catalytic subunit type 2 beta | <i>PIK3C2B</i>  | 1.4 | Cytoplasm           | kinase                     |
| HDAC3    | histone deacetylase 3                                                   | <i>HDAC3</i>    | 1.4 | Nucleus             | transcription regulator    |
| WDR55    | WD repeat domain 55                                                     | <i>Wdr55</i>    | 1.4 | Nucleus             | other                      |
| AQP4     | aquaporin 4                                                             | <i>AQP4</i>     | 1.4 | Plasma membrane     | transporter                |
| F12      | coagulation factor XII                                                  | <i>F12</i>      | 1.4 | Extracellular Space | peptidase                  |
| SULF2    | sulfatase 2                                                             | <i>SULF2</i>    | 1.4 | Plasma membrane     | enzyme                     |
| DUSP23   | dual specificity phosphatase 23                                         | <i>DUSP23</i>   | 1.4 | Cytoplasm           | phosphatase                |
| Lage3    | L antigen family, member 3                                              | <i>Lage3</i>    | 1.4 | Nucleus             | other                      |
| ZBTB2    | zinc finger and BTB domain containing 2                                 | <i>ZBTB2</i>    | 1.4 | Nucleus             | transcription regulator    |
| SDF2     | stromal cell derived factor 2                                           | <i>SDF2</i>     | 1.4 | Extracellular Space | enzyme                     |
| ADAM15   | ADAM metallopeptidase domain 15                                         | <i>Adam15</i>   | 1.4 | Plasma membrane     | peptidase                  |
| ANKRD13D | ankyrin repeat domain 13D                                               | <i>ANKRD13D</i> | 1.4 | Plasma membrane     | other                      |
| ASMTL    | acetylserotonin O-methyltransferase like                                | <i>ASMTL</i>    | 1.4 | Cytoplasm           | enzyme                     |
| MTRF1L   | mitochondrial translation release factor 1 like                         | <i>MTRF1L</i>   | 1.4 | Cytoplasm           | translation regulator      |
| CRBN     | cereblon                                                                | <i>CRBN</i>     | 1.4 | Cytoplasm           | enzyme                     |
| PPP2R5C  | protein phosphatase 2 regulatory subunit B'gamma                        | <i>PPP2R5C</i>  | 1.4 | Nucleus             | other                      |
| SIK3     | SIK family kinase 3                                                     | <i>SIK3</i>     | 1.4 | Cytoplasm           | kinase                     |
| NPRL2    | NPR2 like, GATOR1 complex subunit                                       | <i>NPRL2</i>    | 1.4 | Cytoplasm           | kinase                     |
| Nrxn3    | neurexin III                                                            | <i>Nrxn3</i>    | 1.4 | Plasma membrane     | other                      |
| ANKFY1   | ankyrin repeat and FYVE domain containing 1                             | <i>Ankfy1</i>   | 1.4 | Cytoplasm           | transcription regulator    |
| ZNF274   | zinc finger protein 274                                                 | <i>ZNF274</i>   | 1.4 | Nucleus             | transcription regulator    |
| VPS28    | VPS28 subunit of ESCRT-I                                                | <i>VPS28</i>    | 1.4 | Cytoplasm           | transporter                |
| MYF6     | myogenic factor 6                                                       | <i>MYF6</i>     | 1.4 | Nucleus             | transcription regulator    |
| MRPL42   | mitochondrial ribosomal protein L42                                     | <i>MRPL42</i>   | 1.4 | Cytoplasm           | other                      |
| MXI1     | MAX interactor 1, dimerization protein                                  | <i>MXI1</i>     | 1.4 | Nucleus             | transcription regulator    |
| RDH10    | retinol dehydrogenase 10                                                | <i>RDH10</i>    | 1.4 | Nucleus             | enzyme                     |
| SPOP     | speckle type BTB/POZ protein                                            | <i>SPOP</i>     | 1.4 | Extracellular Space | other                      |
| ESPL1    | extra spindle pole bodies like 1, separase                              | <i>ESPL1</i>    | 1.4 | Nucleus             | peptidase                  |
| BCKDHB   | branched chain keto acid dehydrogenase E1 subunit beta                  | <i>BCKDHB</i>   | 1.4 | Cytoplasm           | enzyme                     |
| GABRB3   | gamma-aminobutyric acid type A receptor subunit beta3                   | <i>GABRB3</i>   | 1.4 | Plasma membrane     | ion channel                |
| SLC25A4  | solute carrier family 25 member 4                                       | <i>SLC25A4</i>  | 1.4 | Cytoplasm           | transporter                |
| SLC39A3  | solute carrier family 39 member 3                                       | <i>SLC39A3</i>  | 1.4 | Plasma membrane     | transporter                |
| CLCA1    | chloride channel accessory 1                                            | <i>CLCA1</i>    | 1.3 | Plasma membrane     | ion channel                |
| GBA      | glucosylceramidase beta                                                 | <i>GBA</i>      | 1.3 | Cytoplasm           | enzyme                     |
| STRIP1   | striatin interacting protein 1                                          | <i>FAM40A</i>   | 1.3 | Nucleus             | other                      |
| KPNA4    | karyopherin subunit alpha 4                                             | <i>KPNA4</i>    | 1.3 | Nucleus             | other                      |
| PPIF     | peptidylprolyl isomerase F                                              | <i>PPIF</i>     | 1.3 | Cytoplasm           | enzyme                     |
| ACSL1    | acyl-CoA synthetase long chain family member 1                          | <i>ACSL1</i>    | 1.3 | Cytoplasm           | enzyme                     |
| CALCR    | calcitonin receptor                                                     | <i>CALCR</i>    | 1.3 | Plasma membrane     | G-protein coupled receptor |
| CA14     | carbonic anhydrase 14                                                   | <i>CA14</i>     | 1.3 | Plasma membrane     | enzyme                     |
| RPNI     | ribophorin I                                                            | <i>RPNI</i>     | 1.3 | Cytoplasm           | enzyme                     |
| SERPING1 | serpin family G member 1                                                | <i>SERPING1</i> | 1.3 | Extracellular Space | other                      |

|          |                                                                |                 |     |                 |                         |
|----------|----------------------------------------------------------------|-----------------|-----|-----------------|-------------------------|
| ZNF335   | zinc finger protein 335                                        | <i>ZNF335</i>   | 1.3 | Nucleus         | transcription regulator |
| NKIRAS1  | NFKB inhibitor interacting Ras like 1                          | <i>NKIRAS1</i>  | 1.3 | Other           | enzyme                  |
| G3BP1    | G3BP stress granule assembly factor 1                          | <i>G3BP1</i>    | 1.3 | Nucleus         | enzyme                  |
| ZMYND12  | zinc finger MYND-type containing 12                            | <i>Zmynd12</i>  | 1.3 | Other           | other                   |
| EFHD2    | EF-hand domain family member D2                                | <i>Efhd2</i>    | 1.3 | Plasma membrane | other                   |
| TXNDC12  | thioredoxin domain containing 12                               | <i>TXNDC12</i>  | 1.3 | Cytoplasm       | enzyme                  |
| ASIC1    | acid sensing ion channel subunit 1                             | <i>ACCN2</i>    | 1.3 | Plasma membrane | ion channel             |
| MBTPS2   | membrane bound transcription factor peptidase, site 2          | <i>MBTPS2</i>   | 1.3 | Cytoplasm       | peptidase               |
| ABCG2    | ATP binding cassette subfamily G member 2 (Junior blood group) | <i>Abcg2</i>    | 1.3 | Plasma membrane | transporter             |
| INTS3    | integrator complex subunit 3                                   | <i>INTS3</i>    | 1.3 | Nucleus         | other                   |
| BCAT2    | branched chain amino acid transaminase 2                       | <i>BCAT2</i>    | 1.3 | Cytoplasm       | enzyme                  |
| PPM1B    | protein phosphatase, Mg2+/Mn2+ dependent 1B                    | <i>PPM1B</i>    | 1.3 | Cytoplasm       | phosphatase             |
| UBXN1    | UBX domain protein 1                                           | <i>Ubxn1</i>    | 1.3 | Cytoplasm       | other                   |
| CEP63    | centrosomal protein 63                                         | <i>CEP63</i>    | 1.3 | Cytoplasm       | other                   |
| ANGEL2   | angel homologue 2                                              | <i>ANGEL2</i>   | 1.3 | Nucleus         | other                   |
| HBE1     | hemoglobin subunit epsilon 1                                   | <i>HBE1</i>     | 1.3 | Cytoplasm       | transporter             |
| KAT6A    | lysine acetyltransferase 6A                                    | <i>MYST3</i>    | 1.3 | Nucleus         | enzyme                  |
| SERPINB1 | serpin family B member 1                                       | <i>SERPINB1</i> | 1.3 | Cytoplasm       | other                   |
| TOB2     | transducer of ERBB2, 2                                         | <i>Tob2</i>     | 1.3 | Nucleus         | other                   |
| GAD1     | glutamate decarboxylase 1                                      | <i>Gad1</i>     | 1.3 | Cytoplasm       | enzyme                  |
| APIP     | APAF1 interacting protein                                      | <i>APIP</i>     | 1.3 | Cytoplasm       | enzyme                  |
| UBE2S    | ubiquitin conjugating enzyme E2 S                              | <i>Ube2s</i>    | 1.3 | Nucleus         | enzyme                  |
| MGST3    | microsomal glutathione S-transferase 3                         | <i>Mgst3</i>    | 1.3 | Cytoplasm       | enzyme                  |
| SLTM     | SAFB like transcription modulator                              | <i>SLTM</i>     | 1.3 | Nucleus         | other                   |
| VCP      | valosin containing protein                                     | <i>Vcp</i>      | 1.3 | Cytoplasm       | enzyme                  |
| GULP1    | GULP PTB domain containing engulfment adaptor 1                | <i>GULP1</i>    | 1.3 | Cytoplasm       | other                   |
| TNFRSF25 | TNF receptor superfamily member 25                             | <i>TNFRSF25</i> | 1.3 | Plasma membrane | transmembrane receptor  |
| USP16    | ubiquitin specific peptidase 16                                | <i>USP16</i>    | 1.3 | Cytoplasm       | peptidase               |
| SAT2     | spermidine/spermine N1-acetyltransferase family member 2       | <i>SAT2</i>     | 1.3 | Plasma membrane | enzyme                  |
| PPIG     | peptidylprolyl isomerase G                                     | <i>PPIG</i>     | 1.3 | Nucleus         | enzyme                  |
| EBNA1BP2 | EBNA1 binding protein 2                                        | <i>EBNA1BP2</i> | 1.3 | Nucleus         | other                   |
| NDUFB9   | NADH:ubiquinone oxidoreductase subunit B9                      | <i>NDUFB9</i>   | 1.3 | Cytoplasm       | enzyme                  |
| CREB1    | cAMP responsive element binding protein 1                      | <i>CREB1</i>    | 1.3 | Nucleus         | transcription regulator |
| PLA2G12A | phospholipase A2 group X1IA                                    | <i>Pla2g12a</i> | 1.3 | Other           | enzyme                  |
| CUL7     | cullin 7                                                       | <i>CUL7</i>     | 1.3 | Cytoplasm       | enzyme                  |
| QPCT     | glutaminyl-peptide cyclotransferase                            | <i>QPCT</i>     | 1.3 | Cytoplasm       | enzyme                  |
| CD81     | CD81 molecule                                                  | <i>CD81</i>     | 1.3 | Plasma membrane | other                   |
| DDX50    | DEXD-box helicase 50                                           | <i>DDX50</i>    | 1.3 | Nucleus         | enzyme                  |
| AFF4     | AF4/FMR2 family member 4                                       | <i>AFF4</i>     | 1.3 | Nucleus         | transcription regulator |
| FDFT1    | farnesyl-diphosphate farnesyltransferase 1                     | <i>FDFT1</i>    | 1.3 | Cytoplasm       | enzyme                  |
| TRIM38   | tripartite motif containing 38                                 | <i>TRIM38</i>   | 1.3 | Cytoplasm       | enzyme                  |
| SCN9A    | sodium voltage-gated channel alpha subunit 9                   | <i>SCN9A</i>    | 1.3 | Plasma membrane | ion channel             |
| FBXO5    | F-box protein 5                                                | <i>Fbxo5</i>    | 1.3 | Nucleus         | enzyme                  |
| POLRMT   | RNA polymerase mitochondrial                                   | <i>Polrmt</i>   | 1.3 | Cytoplasm       | enzyme                  |
| C11orf16 | chromosome 11 open reading frame 16                            | <i>C11orf16</i> | 1.3 | Other           | other                   |

|           |                                                          |                  |     |                     |                         |
|-----------|----------------------------------------------------------|------------------|-----|---------------------|-------------------------|
| RELN      | reelin                                                   | <i>RELN</i>      | 1.3 | Extracellular Space | peptidase               |
| AUNIP     | aurora kinase A and ninein interacting protein           | <i>C1orf135</i>  | 1.3 | Cytoplasm           | other                   |
| NME1-NME2 | NME1-NME2 readthrough                                    | <i>NME1-NME2</i> | 1.3 | Cytoplasm           | other                   |
| EGR1      | early growth response 1                                  | <i>Egr1</i>      | 1.3 | Nucleus             | transcription regulator |
| SSR3      | signal sequence receptor subunit 3                       | <i>SSR3</i>      | 1.3 | Cytoplasm           | other                   |
| GPN3      | GPN-loop GTPase 3                                        | <i>Gpn3</i>      | 1.3 | Cytoplasm           | other                   |
| SOD1      | superoxide dismutase 1                                   | <i>SOD1</i>      | 1.3 | Cytoplasm           | enzyme                  |
| ZZEF1     | zinc finger ZZ-type and EF-hand domain containing 1      | <i>ZZEF1</i>     | 1.3 | Nucleus             | transcription regulator |
| MPDU1     | mannose-P-dolichol utilization defect 1                  | <i>MPDU1</i>     | 1.3 | Cytoplasm           | other                   |
| TRIM47    | tripartite motif containing 47                           | <i>TRIM47</i>    | 1.3 | Cytoplasm           | enzyme                  |
| SNU13     | small nuclear ribonucleoprotein 13                       | <i>NHP2L1</i>    | 1.3 | Nucleus             | other                   |
| PSMD8     | proteasome 26S subunit, non-ATPase 8                     | <i>PSMD8</i>     | 1.3 | Cytoplasm           | other                   |
| ATP5PB    | ATP synthase peripheral stalk-membrane subunit b         | <i>ATP5F1</i>    | 1.3 | Cytoplasm           | transporter             |
| BOLL      | boule homologue, RNA binding protein                     | <i>BOLL</i>      | 1.3 | Cytoplasm           | translation regulator   |
| REPIN1    | replication initiator 1                                  | <i>REPIN1</i>    | 1.3 | Nucleus             | other                   |
| SETDB1    | SET domain bifurcated histone lysine methyltransferase 1 | <i>Setdb1</i>    | 1.3 | Nucleus             | enzyme                  |
| PCSK5     | proprotein convertase subtilisin/kexin type 5            | <i>PCSK5</i>     | 1.3 | Extracellular Space | peptidase               |
| APIG1     | adaptor related protein complex 1 subunit gamma 1        | <i>ApiG1</i>     | 1.3 | Cytoplasm           | other                   |
| AMY2B     | amylase alpha 2B                                         | <i>AMY2B</i>     | 1.3 | Extracellular Space | enzyme                  |
| SMPD3     | sphingomyelin phosphodiesterase 3                        | <i>Smpd3</i>     | 1.3 | Cytoplasm           | enzyme                  |
| SORCS2    | sortilin related VPS10 domain containing receptor 2      | <i>Sorcs2</i>    | 1.3 | Plasma membrane     | transporter             |
| OAF       | out at first homologue                                   | <i>OAF</i>       | 1.3 | Cytoplasm           | other                   |
| NSMAF     | neutral sphingomyelinase activation associated factor    | <i>NSMAF</i>     | 1.3 | Cytoplasm           | other                   |
| CLIC2     | chloride intracellular channel 2                         | <i>CLIC2</i>     | 1.3 | Cytoplasm           | enzyme                  |
| EIF3C     | eukaryotic translation initiation factor 3 subunit C     | <i>EIF3C</i>     | 1.3 | Cytoplasm           | translation regulator   |
| ADIPOQ    | adiponectin, C1Q and collagen domain containing          | <i>ADIPOQ</i>    | 1.3 | Extracellular Space | other                   |
| C1orf21   | chromosome 1 open reading frame 21                       | <i>C1orf21</i>   | 1.3 | Other               | other                   |
| UBE2N     | ubiquitin conjugating enzyme E2 N                        | <i>UBE2N</i>     | 1.3 | Cytoplasm           | enzyme                  |
| CXCL2     | C-X-C motif chemokine ligand 2                           | <i>CXCL2</i>     | 1.3 | Extracellular Space | cytokine                |
| RILPL1    | Rab interacting lysosomal protein like 1                 | <i>RILPL1</i>    | 1.3 | Cytoplasm           | other                   |
| TSPAN13   | tetraspanin 13                                           | <i>TSPAN13</i>   | 1.3 | Plasma membrane     | other                   |
| UBE3B     | ubiquitin protein ligase E3B                             | <i>UBE3B</i>     | 1.3 | Extracellular Space | enzyme                  |
| BUD13     | BUD13 homologue                                          | <i>BUD13</i>     | 1.3 | Nucleus             | other                   |
| FOLR1     | folate receptor alpha                                    | <i>FOLR1</i>     | 1.3 | Plasma membrane     | transporter             |
| ORMDL2    | ORMDL sphingolipid biosynthesis regulator 2              | <i>ORMDL2</i>    | 1.3 | Cytoplasm           | other                   |
| GPATCH2L  | G-patch domain containing 2 like                         | <i>C14orf118</i> | 1.3 | Other               | other                   |
| PSPH      | phosphoserine phosphatase                                | <i>PSPH</i>      | 1.3 | Cytoplasm           | phosphatase             |
| GPC6      | glypican 6                                               | <i>GPC6</i>      | 1.3 | Plasma membrane     | transmembrane receptor  |
| BCL9      | BCL9 transcription activator                             | <i>BCL9</i>      | 1.3 | Nucleus             | other                   |
| SLC7A10   | solute carrier family 7 member 10                        | <i>SLC7A10</i>   | 1.3 | Plasma membrane     | transporter             |
| CHPT1     | choline phosphotransferase 1                             | <i>CHPT1</i>     | 1.3 | Cytoplasm           | enzyme                  |
| DCTPP1    | dCTP pyrophosphatase 1                                   | <i>DCTPP1</i>    | 1.3 | Cytoplasm           | enzyme                  |
| KRT17P3   | keratin 17 pseudogene 3                                  | <i>KRT17P3</i>   | 1.3 | Other               | other                   |

|         |                                                                   |                |     |                     |                                   |
|---------|-------------------------------------------------------------------|----------------|-----|---------------------|-----------------------------------|
| SCAMP3  | secretory carrier membrane protein 3                              | <i>Scamp3</i>  | 1.3 | Cytoplasm           | transporter                       |
| GPRIN2  | G protein regulated inducer of neurite outgrowth 2                | <i>GPRIN2</i>  | 1.3 | Other               | other                             |
| FBXW4   | F-box and WD repeat domain containing 4                           | <i>FBXW4</i>   | 1.3 | Cytoplasm           | other                             |
| FBXO36  | F-box protein 36                                                  | <i>FBXO36</i>  | 1.3 | Other               | other                             |
| PKP2    | plakophilin 2                                                     | <i>Pkp2</i>    | 1.3 | Plasma membrane     | other                             |
| CYCS    | cytochrome c, somatic                                             | <i>CYCS</i>    | 1.3 | Cytoplasm           | enzyme                            |
| FMO2    | flavin containing dimethylaniline monooxygenase 2                 | <i>FMO2</i>    | 1.3 | Cytoplasm           | enzyme                            |
| RBM8A   | RNA binding motif protein 8A                                      | <i>RBM8A</i>   | 1.3 | Nucleus             | other                             |
| PCYOX1L | prenylcysteine oxidase 1 like                                     | <i>PCYOX1L</i> | 1.3 | Other               | other                             |
| ABL1    | ABL proto-oncogene 1, non-receptor tyrosine kinase                | <i>ABL1</i>    | 1.3 | Nucleus             | kinase                            |
| NR3C1   | nuclear receptor subfamily 3 group C member 1                     | <i>NR3C1</i>   | 1.3 | Nucleus             | ligand-dependent nuclear receptor |
| NRP2    | neuropilin 2                                                      | <i>NRP2</i>    | 1.3 | Plasma membrane     | kinase                            |
| HECTD1  | HECT domain E3 ubiquitin protein ligase 1                         | <i>Hectd1</i>  | 1.3 | Other               | enzyme                            |
| SCMH1   | Scm polycomb group protein homologue 1                            | <i>SCMH1</i>   | 1.3 | Nucleus             | transcription regulator           |
| CLDN3   | claudin 3                                                         | <i>CLDN3</i>   | 1.2 | Plasma membrane     | transmembrane receptor            |
| ANXA6   | annexin A6                                                        | <i>ANXA6</i>   | 1.2 | Plasma membrane     | ion channel                       |
| NUDCD3  | NudC domain containing 3                                          | <i>NUDCD3</i>  | 1.2 | Cytoplasm           | other                             |
| HLCS    | holocarboxylase synthetase                                        | <i>HLCS</i>    | 1.2 | Cytoplasm           | enzyme                            |
| FKBPL   | FKBP prolyl isomerase like                                        | <i>FKBPL</i>   | 1.2 | Nucleus             | other                             |
| ABCB10  | ATP binding cassette subfamily B member 10                        | <i>ABCB10</i>  | 1.2 | Cytoplasm           | transporter                       |
| MMP23B  | matrix metalloproteinase 23B                                      | <i>MMP23B</i>  | 1.2 | Extracellular Space | peptidase                         |
| CYB5R1  | cytochrome b5 reductase 1                                         | <i>CYB5R1</i>  | 1.2 | Cytoplasm           | enzyme                            |
| APOBEC4 | apolipoprotein B mRNA editing enzyme catalytic polypeptide like 4 | <i>APOBEC4</i> | 1.2 | Other               | other                             |
| CIQC    | complement C1q C chain                                            | <i>CIQC</i>    | 1.2 | Extracellular Space | other                             |
| CCND1   | cyclin D1                                                         | <i>CCND1</i>   | 1.2 | Nucleus             | transcription regulator           |
| SPRY1   | sprouty RTK signaling antagonist 1                                | <i>SPRY1</i>   | 1.2 | Cytoplasm           | other                             |
| A2M     | alpha-2-macroglobulin                                             | <i>A2M</i>     | 1.2 | Extracellular Space | transporter                       |
| NAE1    | NEDD8 activating enzyme E1 subunit 1                              | <i>Nae1</i>    | 1.2 | Cytoplasm           | enzyme                            |
| TPI1P1  | triosephosphate isomerase 1 pseudogene 1                          | <i>TPI1P1</i>  | 1.2 | Other               | other                             |
| ZDHHC17 | zinc finger DHHC-type palmitoyltransferase 17                     | <i>ZDHHC17</i> | 1.2 | Cytoplasm           | enzyme                            |
| MRPS9   | mitochondrial ribosomal protein S9                                | <i>MRPS9</i>   | 1.2 | Cytoplasm           | other                             |
| PDE4D   | phosphodiesterase 4D                                              | <i>PDE4D</i>   | 1.2 | Cytoplasm           | enzyme                            |
| HDAC2   | histone deacetylase 2                                             | <i>HDAC2</i>   | 1.2 | Nucleus             | transcription regulator           |
| TXNRD1  | thioredoxin reductase 1                                           | <i>TXNRD1</i>  | 1.2 | Cytoplasm           | enzyme                            |
| MMP17   | matrix metalloproteinase 17                                       | <i>MMP17</i>   | 1.2 | Extracellular Space | peptidase                         |
| DCP1B   | decapping mRNA 1B                                                 | <i>DCP1B</i>   | 1.2 | Cytoplasm           | other                             |
| SIKE1   | suppressor of IKBKE 1                                             | <i>SIKE1</i>   | 1.2 | Cytoplasm           | other                             |
| CD69    | CD69 molecule                                                     | <i>CD69</i>    | 1.2 | Plasma membrane     | transmembrane receptor            |
| ZNF197  | zinc finger protein 197                                           | <i>ZNF197</i>  | 1.2 | Nucleus             | transcription regulator           |
| KDM3A   | lysine demethylase 3A                                             | <i>KDM3A</i>   | 1.2 | Nucleus             | transcription regulator           |
| RPUSD3  | RNA pseudouridine synthase D3                                     | <i>Rpsud3</i>  | 1.2 | Cytoplasm           | other                             |

|                         |                                                                                                   |                 |     |                     |                         |
|-------------------------|---------------------------------------------------------------------------------------------------|-----------------|-----|---------------------|-------------------------|
| TNMD                    | tenomodulin                                                                                       | <i>Tnmd</i>     | 1.2 | Plasma membrane     | other                   |
| TSPAN31                 | tetraspanin 31                                                                                    | <i>Tspan31</i>  | 1.2 | Plasma membrane     | other                   |
| RNF25                   | ring finger protein 25                                                                            | <i>RNF25</i>    | 1.2 | Nucleus             | transcription regulator |
| SMARCA1                 | SWI/SNF related, matrix associated, actin dependent regulator of chromatin, subfamily a, member 1 | <i>SMARCA1</i>  | 1.2 | Nucleus             | transcription regulator |
| NUP210L                 | nucleoporin 210 like                                                                              | <i>NUP210L</i>  | 1.2 | Other               | other                   |
| CYP2C18                 | cytochrome P450 family 2 subfamily C member 18                                                    | <i>CYP2C18</i>  | 1.2 | Cytoplasm           | enzyme                  |
| ATP13A1                 | ATPase 13A1                                                                                       | <i>ATP13A1</i>  | 1.2 | Extracellular Space | transporter             |
| SRSF1                   | serine and arginine rich splicing factor 1                                                        | <i>SFRS1</i>    | 1.2 | Nucleus             | other                   |
| TSPAN3                  | tetraspanin 3                                                                                     | <i>TSPAN3</i>   | 1.2 | Plasma membrane     | other                   |
| SLC24A4                 | solute carrier family 24 member 4                                                                 | <i>Slc24a4</i>  | 1.2 | Plasma membrane     | transporter             |
| LRIF1                   | ligand dependent nuclear receptor interacting factor 1                                            | <i>Clorf103</i> | 1.2 | Nucleus             | other                   |
| SEC61A1                 | SEC61 translocon subunit alpha 1                                                                  | <i>SEC61A1</i>  | 1.2 | Cytoplasm           | transporter             |
| STX8                    | syntaxin 8                                                                                        | <i>Stx8</i>     | 1.2 | Plasma membrane     | other                   |
| EDEM2                   | ER degradation enhancing alpha-mannosidase like protein 2                                         | <i>EDEM2</i>    | 1.2 | Cytoplasm           | enzyme                  |
| KIFC3                   | kinesin family member C3                                                                          | <i>Kifc3</i>    | 1.2 | Cytoplasm           | enzyme                  |
| PNPLA6                  | patatin like phospholipase domain containing 6                                                    | <i>PNPLA6</i>   | 1.2 | Cytoplasm           | enzyme                  |
| RNF183                  | ring finger protein 183                                                                           | <i>Rnf183</i>   | 1.2 | Cytoplasm           | enzyme                  |
| RNASEH2A                | ribonuclease H2 subunit A                                                                         | <i>RNASEH2A</i> | 1.2 | Nucleus             | enzyme                  |
| ALG9                    | ALG9 alpha-1,2-mannosyltransferase                                                                | <i>ALG9</i>     | 1.2 | Cytoplasm           | enzyme                  |
| PRKCZ                   | protein kinase C zeta                                                                             | <i>Prkcz</i>    | 1.2 | Cytoplasm           | kinase                  |
| RHOG                    | ras homologue family member G                                                                     | <i>RHOG</i>     | 1.2 | Cytoplasm           | enzyme                  |
| PRKCG                   | protein kinase C gamma                                                                            | <i>PRKCG</i>    | 1.2 | Cytoplasm           | kinase                  |
| MRPS15                  | mitochondrial ribosomal protein S15                                                               | <i>MRPS15</i>   | 1.2 | Cytoplasm           | other                   |
| PSMG2                   | proteasome assembly chaperone 2                                                                   | <i>Psmg2</i>    | 1.2 | Nucleus             | other                   |
| MED13L                  | mediator complex subunit 13L                                                                      | <i>Med13l</i>   | 1.2 | Nucleus             | other                   |
| RGPD4 (includes others) | RANBP2 like and GRIP domain containing 5                                                          | <i>Ranbp2</i>   | 1.2 | Nucleus             | enzyme                  |
| ANK3                    | ankyrin 3                                                                                         | <i>ANK3</i>     | 1.2 | Plasma membrane     | other                   |
| TMEM39B                 | transmembrane protein 39B                                                                         | <i>TMEM39B</i>  | 1.2 | Cytoplasm           | other                   |
| GADD45A                 | growth arrest and DNA damage inducible alpha                                                      | <i>GADD45A</i>  | 1.2 | Nucleus             | other                   |
| YES1                    | YES proto-oncogene 1, Src family tyrosine kinase                                                  | <i>YES1</i>     | 1.2 | Cytoplasm           | kinase                  |
| TRAPPC6A                | trafficking protein particle complex subunit 6A                                                   | <i>TRAPPC6A</i> | 1.2 | Cytoplasm           | other                   |
| KRT13                   | keratin 13                                                                                        | <i>KRT13</i>    | 1.2 | Cytoplasm           | other                   |
| GIPC2                   | GIPC PDZ domain containing family member 2                                                        | <i>GIPC2</i>    | 1.2 | Cytoplasm           | other                   |
| ZNF653                  | zinc finger protein 653                                                                           | <i>ZNF653</i>   | 1.2 | Other               | transcription regulator |
| BOP1                    | BOP1 ribosomal biogenesis factor                                                                  | <i>BOP1</i>     | 1.2 | Nucleus             | other                   |
| OCEL1                   | occludin/ELL domain containing 1                                                                  | <i>OCEL1</i>    | 1.2 | Other               | other                   |
| MTREX                   | Mtr4 exosome RNA helicase                                                                         | <i>SKIV2L2</i>  | 1.2 | Nucleus             | enzyme                  |
| ZNF567                  | zinc finger protein 567                                                                           | <i>ZNF567</i>   | 1.2 | Nucleus             | transcription regulator |
| CALN1                   | calneuron 1                                                                                       | <i>CALN1</i>    | 1.2 | Cytoplasm           | other                   |
| APRT                    | adenine phosphoribosyltransferase                                                                 | <i>Aprt</i>     | 1.2 | Cytoplasm           | enzyme                  |
| ACER3                   | alkaline ceramidase 3                                                                             | <i>ACER3</i>    | 1.2 | Cytoplasm           | enzyme                  |

|           |                                                        |                  |     |                     |                         |
|-----------|--------------------------------------------------------|------------------|-----|---------------------|-------------------------|
| MRPS26    | mitochondrial ribosomal protein S26                    | <i>MRPS26</i>    | 1.2 | Cytoplasm           | other                   |
| ST3GAL1   | ST3 beta-galactoside alpha-2,3-sialyltransferase 1     | <i>ST3GAL1</i>   | 1.2 | Cytoplasm           | enzyme                  |
| KLHL41    | kelch like family member 41                            | <i>KBTBD10</i>   | 1.2 | Cytoplasm           | other                   |
| IL7       | interleukin 7                                          | <i>IL7</i>       | 1.2 | Extracellular Space | cytokine                |
| VRK3      | VRK serine/threonine kinase 3                          | <i>VRK3</i>      | 1.2 | Nucleus             | kinase                  |
| MOSPD1    | motile sperm domain containing 1                       | <i>MOSPD1</i>    | 1.2 | Other               | other                   |
| RAB3B     | RAB3B, member RAS oncogene family                      | <i>RAB3B</i>     | 1.2 | Cytoplasm           | enzyme                  |
| RETREG1   | reticulophagy regulator 1                              | <i>FAM134B</i>   | 1.2 | Cytoplasm           | other                   |
| ATP6V1A   | ATPase H+ transporting V1 subunit A                    | <i>Atp6v1a</i>   | 1.2 | Plasma membrane     | transporter             |
| FCGBP     | Fc fragment of IgG binding protein                     | <i>FCGBP</i>     | 1.2 | Extracellular Space | other                   |
| TPBG      | trophoblast glycoprotein                               | <i>TPBG</i>      | 1.2 | Plasma membrane     | other                   |
| RAB14     | RAB14, member RAS oncogene family                      | <i>Rab14</i>     | 1.2 | Cytoplasm           | enzyme                  |
| DLK2      | delta like non-canonical Notch ligand 2                | <i>DLK2</i>      | 1.2 | Extracellular Space | other                   |
| THAP2     | THAP domain containing 2                               | <i>Thap2</i>     | 1.2 | Nucleus             | transcription regulator |
| TMEM161B  | transmembrane protein 161B                             | <i>TMEM161B</i>  | 1.2 | Plasma membrane     | other                   |
| REN       | renin                                                  | <i>REN</i>       | 1.2 | Extracellular Space | peptidase               |
| MFN2      | mitofusin 2                                            | <i>MFN2</i>      | 1.2 | Cytoplasm           | enzyme                  |
| CYSTM1    | cysteine rich transmembrane module containing 1        | <i>C5orf32</i>   | 1.2 | Cytoplasm           | other                   |
| CCDC181   | coiled-coil domain containing 181                      | <i>C1orf114</i>  | 1.2 | Nucleus             | other                   |
| CDK16     | cyclin dependent kinase 16                             | <i>CDK16</i>     | 1.2 | Cytoplasm           | kinase                  |
| GALNT1    | polypeptide N-acetylgalactosaminyltransferase 1        | <i>GALNT1</i>    | 1.2 | Cytoplasm           | enzyme                  |
| TSC1      | TSC complex subunit 1                                  | <i>TSC1</i>      | 1.2 | Cytoplasm           | other                   |
| ABCB7     | ATP binding cassette subfamily B member 7              | <i>ABCB7</i>     | 1.2 | Cytoplasm           | transporter             |
| MUSK      | muscle associated receptor tyrosine kinase             | <i>MUSK</i>      | 1.2 | Plasma membrane     | kinase                  |
| TAF6L     | TATA-box binding protein associated factor 6 like      | <i>TAF6L</i>     | 1.2 | Nucleus             | transcription regulator |
| PMPCB     | peptidase, mitochondrial processing subunit beta       | <i>PMPCB</i>     | 1.2 | Cytoplasm           | peptidase               |
| MYH3      | myosin heavy chain 3                                   | <i>Myh3</i>      | 1.2 | Cytoplasm           | enzyme                  |
| ACP2      | acid phosphatase 2, lysosomal                          | <i>ACP2</i>      | 1.2 | Cytoplasm           | phosphatase             |
| UQCRC1    | ubiquinol-cytochrome c reductase core protein 1        | <i>Uqcrc1</i>    | 1.2 | Cytoplasm           | enzyme                  |
| RAB11FIP3 | RAB11 family interacting protein 3                     | <i>RAB11FIP3</i> | 1.2 | Cytoplasm           | other                   |
| DOCK6     | dedicator of cytokinesis 6                             | <i>Dock6</i>     | 1.2 | Cytoplasm           | other                   |
| STAMBPL1  | STAM binding protein like 1                            | <i>STAMBPL1</i>  | 1.2 | Cytoplasm           | enzyme                  |
| MPC2      | mitochondrial pyruvate carrier 2                       | <i>BRP44</i>     | 1.2 | Plasma membrane     | transporter             |
| HNRNPA0   | heterogeneous nuclear ribonucleoprotein A0             | <i>HNRNPA0</i>   | 1.2 | Nucleus             | other                   |
| MOV10L1   | Mov10 like RISC complex RNA helicase 1                 | <i>Mov10l1</i>   | 1.2 | Nucleus             | enzyme                  |
| TMEM14C   | transmembrane protein 14C                              | <i>TMEM14C</i>   | 1.2 | Plasma membrane     | other                   |
| PDCD10    | programmed cell death 10                               | <i>PDCD10</i>    | 1.2 | Cytoplasm           | other                   |
| CYP4F2    | cytochrome P450 family 4 subfamily F member 2          | <i>CYP4F2</i>    | 1.2 | Cytoplasm           | enzyme                  |
| OSTCP1    | oligosaccharyltransferase complex subunit pseudogene 1 | <i>OSTCL</i>     | 1.2 | Other               | other                   |
| LRRN1     | leucine rich repeat neuronal 1                         | <i>LRRN1</i>     | 1.2 | Other               | other                   |
| TRIM3     | tripartite motif containing 3                          | <i>Trim3</i>     | 1.2 | Cytoplasm           | enzyme                  |
| DERL2     | derlin 2                                               | <i>Derl2</i>     | 1.2 | Cytoplasm           | other                   |
| MYOF      | myoferlin                                              | <i>Myof</i>      | 1.2 | Nucleus             | other                   |
| ATP5F1A   | ATP synthase F1 subunit alpha                          | <i>Atp5a1</i>    | 1.2 | Cytoplasm           | transporter             |

|          |                                                                           |                 |     |                     |                         |
|----------|---------------------------------------------------------------------------|-----------------|-----|---------------------|-------------------------|
| PTK2     | protein tyrosine kinase 2                                                 | <i>PTK2</i>     | 1.2 | Cytoplasm           | kinase                  |
| VASH1    | vasohibin 1                                                               | <i>Vash1</i>    | 1.2 | Extracellular Space | peptidase               |
| CHAMP1   | chromosome alignment maintaining phosphoprotein 1                         | <i>ZNF828</i>   | 1.2 | Nucleus             | other                   |
| SSBP4    | single stranded DNA binding protein 4                                     | <i>SSBP4</i>    | 1.2 | Nucleus             | transcription regulator |
| CLIC1    | chloride intracellular channel 1                                          | <i>CLIC1</i>    | 1.2 | Nucleus             | ion channel             |
| KLHDC1   | kelch domain containing 1                                                 | <i>Klhdc1</i>   | 1.2 | Cytoplasm           | other                   |
| RPL18    | ribosomal protein L18                                                     | <i>RPL18</i>    | 1.2 | Cytoplasm           | other                   |
| CRYGS    | crystallin gamma S                                                        | <i>CRYGS</i>    | 1.2 | Other               | other                   |
| AMZ2     | archaelysin family metallopeptidase 2                                     | <i>Amz2</i>     | 1.2 | Other               | other                   |
| WDR76    | WD repeat domain 76                                                       | <i>WDR76</i>    | 1.2 | Nucleus             | other                   |
| PAPSS2   | 3'-phosphoadenosine 5'-phosphosulfate synthase 2                          | <i>PAPSS2</i>   | 1.2 | Cytoplasm           | enzyme                  |
| ANKRD2   | ankyrin repeat domain 2                                                   | <i>ANKRD2</i>   | 1.2 | Nucleus             | transcription regulator |
| NAV3     | neuron navigator 3                                                        | <i>NAV3</i>     | 1.2 | Nucleus             | other                   |
| NFIC     | nuclear factor I C                                                        | <i>NFIC</i>     | 1.2 | Nucleus             | transcription regulator |
| TOMM20   | translocase of outer mitochondrial membrane 20                            | <i>TOMM20</i>   | 1.2 | Cytoplasm           | transporter             |
| KDM6A    | lysine demethylase 6A                                                     | <i>Kdm6a</i>    | 1.2 | Nucleus             | enzyme                  |
| NDUFA4   | NDUFA4 mitochondrial complex associated                                   | <i>Ndufa4</i>   | 1.2 | Cytoplasm           | enzyme                  |
| MPDZ     | multiple PDZ domain crumbs cell polarity complex component                | <i>MPDZ</i>     | 1.2 | Plasma membrane     | other                   |
| YPEL5    | yippee like 5                                                             | <i>YPEL5</i>    | 1.2 | Nucleus             | other                   |
| TSSC4    | tumor suppressing subtransferable candidate 4                             | <i>Tssc4</i>    | 1.2 | Other               | other                   |
| IGF2BP1  | insulin like growth factor 2 mRNA binding protein 1                       | <i>IGF2BP1</i>  | 1.2 | Cytoplasm           | translation regulator   |
| HHIPL1   | HHIP like 1                                                               | <i>HHIPL1</i>   | 1.2 | Other               | other                   |
| IGSF1    | immunoglobulin superfamily member 1                                       | <i>IGSF1</i>    | 1.2 | Plasma membrane     | other                   |
| CYP27A1  | cytochrome P450 family 27 subfamily A member 1                            | <i>Cyp27a1</i>  | 1.2 | Cytoplasm           | enzyme                  |
| B4GALNT1 | beta-1,4-N-acetyl-galactosaminyltransferase 1                             | <i>B4GALNT1</i> | 1.2 | Cytoplasm           | enzyme                  |
| ATP2A2   | ATPase sarcoplasmic/endoplasmic reticulum Ca <sup>2+</sup> transporting 2 | <i>ATP2A2</i>   | 1.2 | Cytoplasm           | transporter             |
| PI4K2A   | phosphatidylinositol 4-kinase type 2 alpha                                | <i>PI4K2A</i>   | 1.2 | Cytoplasm           | kinase                  |
| CCSER2   | coiled-coil serine rich protein 2                                         | <i>FAM190B</i>  | 1.2 | Other               | other                   |
| PHKB     | phosphorylase kinase regulatory subunit beta                              | <i>Phkb</i>     | 1.2 | Cytoplasm           | kinase                  |
| EIF4G3   | eukaryotic translation initiation factor 4 gamma 3                        | <i>Eif4g3</i>   | 1.2 | Cytoplasm           | translation regulator   |
| BPNT2    | 3'(2'), 5'-bisphosphate nucleotidase 2                                    | <i>IMPAD1</i>   | 1.2 | Cytoplasm           | enzyme                  |
| NELL1    | neural EGFL like 1                                                        | <i>Nell1</i>    | 1.2 | Extracellular Space | growth factor           |
| CALR     | calreticulin                                                              | <i>CALR</i>     | 1.1 | Cytoplasm           | transcription regulator |
| COQ3     | coenzyme Q3, methyltransferase                                            | <i>COQ3</i>     | 1.1 | Cytoplasm           | enzyme                  |
| DAD1     | defender against cell death 1                                             | <i>DAD1</i>     | 1.1 | Cytoplasm           | other                   |
| CREB3L1  | cAMP responsive element binding protein 3 like 1                          | <i>CREB3L1</i>  | 1.1 | Nucleus             | transcription regulator |
| SMIM29   | small integral membrane protein 29                                        | <i>C6orf1</i>   | 1.1 | Other               | other                   |
| EIF1AD   | eukaryotic translation initiation factor 1A domain containing             | <i>Eif1ad</i>   | 1.1 | Nucleus             | other                   |
| DCAF12   | DDB1 and CUL4 associated factor 12                                        | <i>DCAF12</i>   | 1.1 | Cytoplasm           | other                   |
| COPS5    | COP9 signalosome subunit 5                                                | <i>Cops5</i>    | 1.1 | Nucleus             | transcription regulator |
| RNASE6   | ribonuclease A family member k6                                           | <i>RNASE6</i>   | 1.1 | Extracellular Space | enzyme                  |
| RTN3     | reticulon 3                                                               | <i>RTN3</i>     | 1.1 | Cytoplasm           | other                   |



|          |                                                                                                            |                |     |                        |                                      |
|----------|------------------------------------------------------------------------------------------------------------|----------------|-----|------------------------|--------------------------------------|
| KAT6B    | lysine acetyltransferase 6B                                                                                | <i>MYST4</i>   | 1.1 | Nucleus                | enzyme                               |
| SH2D3A   | SH2 domain containing 3A                                                                                   | <i>SH2D3A</i>  | 1.1 | Cytoplasm              | other                                |
| UTP23    | UTP23 small subunit<br>processome component                                                                | <i>UTP23</i>   | 1.1 | Other                  | other                                |
| CLASRP   | CLK4 associating<br>serine/arginine rich protein                                                           | <i>SFRS16</i>  | 1.1 | Nucleus                | other                                |
| FABP1    | fatty acid binding protein 1                                                                               | <i>FABP1</i>   | 1.1 | Cytoplasm              | transporter                          |
| PENK     | proenkephalin                                                                                              | <i>Penk</i>    | 1.1 | Extracellular<br>Space | other                                |
| PPA2     | inorganic pyrophosphatase 2                                                                                | <i>PPA2</i>    | 1.1 | Cytoplasm              | enzyme                               |
| B9D1     | B9 domain containing 1                                                                                     | <i>B9D1</i>    | 1.1 | Plasma<br>membrane     | other                                |
| ESR1     | estrogen receptor 1                                                                                        | <i>Esr1</i>    | 1.1 | Nucleus                | ligand-dependent<br>nuclear receptor |
| MAP7D1   | MAP7 domain containing 1                                                                                   | <i>MAP7D1</i>  | 1.1 | Cytoplasm              | other                                |
| PAIP2    | poly(A) binding protein<br>interacting protein 2                                                           | <i>Paip2</i>   | 1.1 | Cytoplasm              | translation<br>regulator             |
| AMH      | anti-Mullerian hormone                                                                                     | <i>Amh</i>     | 1.1 | Extracellular<br>Space | growth factor                        |
| DET1     | DET1 partner of COP1 E3<br>ubiquitin ligase                                                                | <i>DET1</i>    | 1.1 | Nucleus                | other                                |
| PIGN     | phosphatidylinositol glycan<br>anchor biosynthesis class N                                                 | <i>Pign</i>    | 1.1 | Cytoplasm              | enzyme                               |
| LCORL    | ligand dependent nuclear<br>receptor corepressor like                                                      | <i>LCORL</i>   | 1.1 | Nucleus                | transcription<br>regulator           |
| FBXW2    | F-box and WD repeat domain<br>containing 2                                                                 | <i>FBXW2</i>   | 1.1 | Cytoplasm              | enzyme                               |
| HDAC6    | histone deacetylase 6                                                                                      | <i>HDAC6</i>   | 1.1 | Nucleus                | transcription<br>regulator           |
| SLC22A1  | solute carrier family 22<br>member 1                                                                       | <i>SLC22A1</i> | 1.1 | Plasma<br>membrane     | transporter                          |
| RHPN2P1  | rhophilin Rho GTPase binding<br>protein 2 pseudogene 1                                                     | <i>RHPN2P1</i> | 1.1 | Other                  | other                                |
| SDE2     | SDE2 telomere maintenance<br>homologue                                                                     | <i>C1orf55</i> | 1.1 | Nucleus                | other                                |
| SLC26A6  | solute carrier family 26<br>member 6                                                                       | <i>Slc26a6</i> | 1.1 | Cytoplasm              | transporter                          |
| SOX4     | SRY-box transcription factor 4                                                                             | <i>Sox4</i>    | 1.1 | Nucleus                | transcription<br>regulator           |
| TOMM70   | translocase of outer<br>mitochondrial membrane 70                                                          | <i>TOMM70A</i> | 1.1 | Cytoplasm              | transporter                          |
| SMARCA4  | SWI/SNF related, matrix<br>associated, actin dependent<br>regulator of chromatin,<br>subfamily a, member 4 | <i>SMARCA4</i> | 1.1 | Nucleus                | transcription<br>regulator           |
| VPS36    | vacuolar protein sorting 36<br>homologue                                                                   | <i>VPS36</i>   | 1.1 | Cytoplasm              | other                                |
| PRDM1    | PR/SET domain 1                                                                                            | <i>PRDM1</i>   | 1.1 | Nucleus                | transcription<br>regulator           |
| EFNA1    | ephrin A1                                                                                                  | <i>EFNA1</i>   | 1.1 | Plasma<br>membrane     | other                                |
| CFAP20DC | CFAP20 domain containing                                                                                   | <i>C3orf67</i> | 1.1 | Other                  | other                                |
| ADNP     | activity dependent<br>neuroprotector homeobox                                                              | <i>ADNP</i>    | 1.1 | Nucleus                | transcription<br>regulator           |
| BAMBI    | BMP and activin membrane<br>bound inhibitor                                                                | <i>BAMBI</i>   | 1.1 | Plasma<br>membrane     | other                                |
| SLC7A9   | solute carrier family 7 member<br>9                                                                        | <i>Slc7a9</i>  | 1.1 | Plasma<br>membrane     | transporter                          |
| RAB33B   | RAB33B, member RAS<br>oncogene family                                                                      | <i>RAB33B</i>  | 1.1 | Cytoplasm              | enzyme                               |
| MTMR9    | myotubularin related protein 9                                                                             | <i>Mtmr9</i>   | 1.1 | Cytoplasm              | phosphatase                          |
| MAST2    | microtubule associated<br>serine/threonine kinase 2                                                        | <i>MAST2</i>   | 1.1 | Cytoplasm              | kinase                               |
| SFT2D3   | SFT2 domain containing 3                                                                                   | <i>Sft2d3</i>  | 1.1 | Other                  | other                                |
| TSC22D4  | TSC22 domain family member<br>4                                                                            | <i>TSC22D4</i> | 1.1 | Nucleus                | transcription<br>regulator           |
| BACE2    | beta-secretase 2                                                                                           | <i>BACE2</i>   | 1.1 | Cytoplasm              | peptidase                            |
| KLHDC8A  | kelch domain containing 8A                                                                                 | <i>Klhdc8a</i> | 1.1 | Other                  | other                                |
| PTCRA    | pre T cell antigen receptor<br>alpha                                                                       | <i>PTCRA</i>   | 1.1 | Plasma<br>membrane     | other                                |
| ACSL4    | acyl-CoA synthetase long chain<br>family member 4                                                          | <i>Acs14</i>   | 1.1 | Cytoplasm              | enzyme                               |
| PLCD1    | phospholipase C delta 1                                                                                    | <i>Plcd1</i>   | 1.1 | Cytoplasm              | enzyme                               |

|         |                                                                    |                |      |                     |                            |
|---------|--------------------------------------------------------------------|----------------|------|---------------------|----------------------------|
| PI4KA   | phosphatidylinositol 4-kinase alpha                                | <i>PI4KA</i>   | 1.1  | Cytoplasm           | kinase                     |
| LPL     | lipoprotein lipase                                                 | <i>Lpl</i>     | 1.1  | Cytoplasm           | enzyme                     |
| EIF5B   | eukaryotic translation initiation factor 5B                        | <i>Eif5b</i>   | 1.1  | Cytoplasm           | translation regulator      |
| FBH1    | F-box DNA helicase 1                                               | <i>FBXO18</i>  | 1.1  | Nucleus             | enzyme                     |
| ANAPC1  | anaphase promoting complex subunit 1                               | <i>ANAPC1</i>  | 1.1  | Nucleus             | other                      |
| NCDN    | neurochondrin                                                      | <i>Ncdn</i>    | 1.1  | Cytoplasm           | other                      |
| CELA3B  | chymotrypsin like elastase 3B                                      | <i>CELA3B</i>  | 1.1  | Other               | peptidase                  |
| MAPRE1  | microtubule associated protein RP/EB family member 1               | <i>Mapre1</i>  | 1.1  | Cytoplasm           | other                      |
| LDLR    | low density lipoprotein receptor                                   | <i>Ldlr</i>    | 1.1  | Plasma membrane     | transporter                |
| EEF1B2  | eukaryotic translation elongation factor 1 beta 2                  | <i>Eef1b2</i>  | 1.1  | Cytoplasm           | translation regulator      |
| DLL1    | delta like canonical Notch ligand 1                                | <i>DLL1</i>    | 1.1  | Plasma membrane     | enzyme                     |
| CLEC14A | C-type lectin domain containing 14A                                | <i>Clec14a</i> | -1.1 | Cytoplasm           | other                      |
| MTO1    | mitochondrial tRNA translation optimization 1                      | <i>Mto1</i>    | -1.1 | Cytoplasm           | enzyme                     |
| PTPN12  | protein tyrosine phosphatase non-receptor type 12                  | <i>PTPN12</i>  | -1.1 | Cytoplasm           | phosphatase                |
| PAMR1   | peptidase domain containing associated with muscle regeneration 1  | <i>PAMR1</i>   | -1.1 | Extracellular Space | peptidase                  |
| GPR162  | G protein-coupled receptor 162                                     | <i>GPR162</i>  | -1.1 | Plasma membrane     | G-protein coupled receptor |
| NT5DC2  | 5'-nucleotidase domain containing 2                                | <i>NT5DC2</i>  | -1.1 | Cytoplasm           | other                      |
| UCHL5   | ubiquitin C-terminal hydrolase L5                                  | <i>UCHL5</i>   | -1.1 | Cytoplasm           | peptidase                  |
| SV2A    | synaptic vesicle glycoprotein 2A                                   | <i>SV2A</i>    | -1.1 | Cytoplasm           | other                      |
| CFTR    | CF transmembrane conductance regulator                             | <i>CFTR</i>    | -1.1 | Plasma membrane     | ion channel                |
| CDK13   | cyclin dependent kinase 13                                         | <i>CDK13</i>   | -1.1 | Nucleus             | kinase                     |
| DENND4A | DENN domain containing 4A                                          | <i>DENND4A</i> | -1.1 | Nucleus             | other                      |
| SNUPN   | snurportin 1                                                       | <i>Snupn</i>   | -1.1 | Nucleus             | other                      |
| TASP1   | taspase 1                                                          | <i>TASP1</i>   | -1.1 | Nucleus             | peptidase                  |
| AAR2    | AAR2 splicing factor                                               | <i>C20orf4</i> | -1.1 | Other               | other                      |
| RBM5    | RNA binding motif protein 5                                        | <i>RBM5</i>    | -1.1 | Nucleus             | other                      |
| GPR1    | G protein-coupled receptor 1                                       | <i>GPR1</i>    | -1.1 | Plasma membrane     | G-protein coupled receptor |
| ARL4C   | ADP ribosylation factor like GTPase 4C                             | <i>Arl4c</i>   | -1.1 | Nucleus             | enzyme                     |
| TMEM171 | transmembrane protein 171                                          | <i>Tmem171</i> | -1.1 | Other               | other                      |
| ABCB6   | ATP binding cassette subfamily B member 6 (Langereis blood group)  | <i>ABCB6</i>   | -1.1 | Cytoplasm           | transporter                |
| HPRT1   | hypoxanthine phosphoribosyltransferase 1                           | <i>HPRT1</i>   | -1.1 | Cytoplasm           | enzyme                     |
| ATP4A   | ATPase H <sup>+</sup> /K <sup>+</sup> transporting subunit alpha   | <i>ATP4A</i>   | -1.1 | Plasma membrane     | transporter                |
| DTWD1   | DTW domain containing 1                                            | <i>DTWD1</i>   | -1.1 | Nucleus             | enzyme                     |
| BCS1L   | BCS1 homologue, ubiquinol-cytochrome c reductase complex chaperone | <i>BCS1L</i>   | -1.1 | Cytoplasm           | other                      |
| NFX1    | nuclear transcription factor, X-box binding 1                      | <i>NFX1</i>    | -1.1 | Nucleus             | transcription regulator    |
| FAM126B | family with sequence similarity 126 member B                       | <i>FAM126B</i> | -1.1 | Other               | other                      |
| PDHX    | pyruvate dehydrogenase complex component X                         | <i>PDHX</i>    | -1.1 | Cytoplasm           | enzyme                     |
| PRDX1   | peroxiredoxin 1                                                    | <i>PRDX1</i>   | -1.1 | Cytoplasm           | enzyme                     |
| UBA2    | ubiquitin like modifier activating enzyme 2                        | <i>UBA2</i>    | -1.1 | Cytoplasm           | enzyme                     |
| CNPPD1  | cyclin Pas1/PHO80 domain containing 1                              | <i>C2orf24</i> | -1.1 | Other               | other                      |
| BUB1B   | BUB1 mitotic checkpoint serine/threonine kinase B                  | <i>BUB1B</i>   | -1.1 | Nucleus             | kinase                     |
| CDC40   | cell division cycle 40                                             | <i>Cdc40</i>   | -1.1 | Nucleus             | other                      |

|           |                                                                   |                  |      |                     |                         |
|-----------|-------------------------------------------------------------------|------------------|------|---------------------|-------------------------|
| PPP2R5B   | protein phosphatase 2 regulatory subunit B'beta                   | <i>PPP2R5B</i>   | -1.1 | Cytoplasm           | phosphatase             |
| PPP3CB    | protein phosphatase 3 catalytic subunit beta                      | <i>PPP3CB</i>    | -1.1 | Plasma membrane     | phosphatase             |
| PCBP1     | poly(rC) binding protein 1                                        | <i>Pcbp1</i>     | -1.1 | Nucleus             | translation regulator   |
| CNMD      | chondromodulin                                                    | <i>LECT1</i>     | -1.1 | Extracellular Space | other                   |
| CD1B      | CD1b molecule                                                     | <i>CD1B</i>      | -1.1 | Plasma membrane     | other                   |
| ITSN1     | intersectin 1                                                     | <i>ITSN1</i>     | -1.1 | Cytoplasm           | other                   |
| TCF12     | transcription factor 12                                           | <i>TCF12</i>     | -1.1 | Nucleus             | transcription regulator |
| MAPK1IP1L | mitogen-activated protein kinase 1 interacting protein 1 like     | <i>MAPK1IP1L</i> | -1.1 | Nucleus             | other                   |
| GMPR2     | guanosine monophosphate reductase 2                               | <i>GMPR2</i>     | -1.1 | Cytoplasm           | enzyme                  |
| COLEC12   | collectin subfamily member 12                                     | <i>Colec12</i>   | -1.1 | Plasma membrane     | transmembrane receptor  |
| MCM3AP    | minichromosome maintenance complex component 3 associated protein | <i>MCM3AP</i>    | -1.1 | Nucleus             | enzyme                  |
| NCSTN     | nicastatin                                                        | <i>NCSTN</i>     | -1.1 | Plasma membrane     | peptidase               |
| UXS1      | UDP-glucuronate decarboxylase 1                                   | <i>UXS1</i>      | -1.1 | Cytoplasm           | enzyme                  |
| ALG3      | ALG3 alpha-1,3-mannosyltransferase                                | <i>ALG3</i>      | -1.1 | Cytoplasm           | enzyme                  |
| AKAP11    | A-kinase anchoring protein 11                                     | <i>AKAP11</i>    | -1.1 | Cytoplasm           | other                   |
| RNF144A   | ring finger protein 144A                                          | <i>Rnf144a</i>   | -1.1 | Nucleus             | enzyme                  |
| CAP1      | cyclase associated actin cytoskeleton regulatory protein 1        | <i>CAP1</i>      | -1.1 | Plasma membrane     | other                   |
| AGO3      | argonaute RISC catalytic component 3                              | <i>EIF2C3</i>    | -1.1 | Cytoplasm           | translation regulator   |
| LINGO1    | leucine rich repeat and Ig domain containing 1                    | <i>LINGO1</i>    | -1.1 | Plasma membrane     | other                   |
| COPS4     | COP9 signalosome subunit 4                                        | <i>COPS4</i>     | -1.1 | Cytoplasm           | peptidase               |
| NRN1      | neuritin 1                                                        | <i>NRN1</i>      | -1.1 | Cytoplasm           | other                   |
| CSDE1     | cold shock domain containing E1                                   | <i>CSDE1</i>     | -1.1 | Cytoplasm           | enzyme                  |
| SRPK2     | SRSF protein kinase 2                                             | <i>SRPK2</i>     | -1.1 | Nucleus             | kinase                  |
| MIIP      | migration and invasion inhibitory protein                         | <i>MIIP</i>      | -1.1 | Other               | other                   |
| CDK2AP2   | cyclin dependent kinase 2 associated protein 2                    | <i>CDK2AP2</i>   | -1.1 | Nucleus             | other                   |
| ITGA7     | integrin subunit alpha 7                                          | <i>ITGA7</i>     | -1.1 | Plasma membrane     | other                   |
| GIT2      | GIT ArfGAP 2                                                      | <i>GIT2</i>      | -1.1 | Nucleus             | other                   |
| STIMATE   | STIM activating enhancer                                          | <i>TMEM110</i>   | -1.1 | Cytoplasm           | other                   |
| SCG5      | secretogranin V                                                   | <i>SCG5</i>      | -1.1 | Extracellular Space | other                   |
| ARID4A    | AT-rich interaction domain 4A                                     | <i>ARID4A</i>    | -1.1 | Nucleus             | transcription regulator |
| GJB4      | gap junction protein beta 4                                       | <i>GJB4</i>      | -1.1 | Plasma membrane     | transporter             |
| THOC5     | THO complex 5                                                     | <i>Thoc5</i>     | -1.1 | Cytoplasm           | other                   |
| RPL7A     | ribosomal protein L7a                                             | <i>Rpl7a</i>     | -1.1 | Cytoplasm           | other                   |
| MARS2     | methionyl-tRNA synthetase 2, mitochondrial                        | <i>MARS2</i>     | -1.1 | Cytoplasm           | enzyme                  |
| COG8      | component of oligomeric golgi complex 8                           | <i>COG8</i>      | -1.1 | Cytoplasm           | transporter             |
| TEAD2     | TEA domain transcription factor 2                                 | <i>TEAD2</i>     | -1.1 | Nucleus             | transcription regulator |
| NPM1      | nucleophosmin 1                                                   | <i>Npm1</i>      | -1.1 | Nucleus             | transcription regulator |
| CEP43     | centrosomal protein 43                                            | <i>FGFR1OP</i>   | -1.1 | Cytoplasm           | other                   |
| EYA1      | EYA transcriptional coactivator and phosphatase 1                 | <i>Eya1</i>      | -1.1 | Nucleus             | phosphatase             |
| SLC25A15  | solute carrier family 25 member 15                                | <i>SLC25A15</i>  | -1.1 | Cytoplasm           | transporter             |

|           |                                                                   |                  |      |                     |                         |
|-----------|-------------------------------------------------------------------|------------------|------|---------------------|-------------------------|
| PLS1      | plastin 1                                                         | <i>PLS1</i>      | -1.1 | Plasma membrane     | other                   |
| NEMF      | nuclear export mediator factor                                    | <i>SDCCAG1</i>   | -1.1 | Nucleus             | other                   |
| STOML2    | stomatin like 2                                                   | <i>Stoml2</i>    | -1.1 | Plasma membrane     | other                   |
| MAPK10    | mitogen-activated protein kinase 10                               | <i>MAPK10</i>    | -1.1 | Cytoplasm           | kinase                  |
| HNRNPD    | heterogeneous nuclear ribonucleoprotein D                         | <i>HNRNPD</i>    | -1.1 | Nucleus             | transcription regulator |
| INKA1     | inka box actin regulator 1                                        | <i>C3orf54</i>   | -1.1 | Cytoplasm           | other                   |
| VPS13B    | vacuolar protein sorting 13 homologue B                           | <i>VPS13B</i>    | -1.1 | Nucleus             | transporter             |
| MYO10     | myosin X                                                          | <i>Myo10</i>     | -1.1 | Cytoplasm           | enzyme                  |
| HRC       | histidine rich calcium binding protein                            | <i>HRC</i>       | -1.1 | Cytoplasm           | other                   |
| MAGED2    | MAGE family member D2                                             | <i>MAGED2</i>    | -1.1 | Plasma membrane     | other                   |
| CTSH      | cathepsin H                                                       | <i>CTSH</i>      | -1.1 | Cytoplasm           | peptidase               |
| ZIC2      | Zic family member 2                                               | <i>ZIC2</i>      | -1.1 | Nucleus             | transcription regulator |
| DRAP1     | DR1 associated protein 1                                          | <i>DRAP1</i>     | -1.1 | Nucleus             | transcription regulator |
| PNN       | pinin, desmosome associated protein                               | <i>PNN</i>       | -1.1 | Plasma membrane     | other                   |
| KIRREL2   | kirre like nephrin family adhesion molecule 2                     | <i>Kirrel2</i>   | -1.1 | Plasma membrane     | other                   |
| MRPS34    | mitochondrial ribosomal protein S34                               | <i>MRPS34</i>    | -1.1 | Cytoplasm           | other                   |
| PDZK1     | PDZ domain containing 1                                           | <i>Pdzk1</i>     | -1.1 | Plasma membrane     | other                   |
| TMSB4XP8  | TMSB4X pseudogene 8                                               | <i>TMSL3</i>     | -1.1 | Other               | other                   |
| CTTNBP2NL | CTTNBP2 N-terminal like                                           | <i>CTTNBP2NL</i> | -1.1 | Cytoplasm           | other                   |
| ABHD14A   | abhydrolase domain containing 14A                                 | <i>ABHD14A</i>   | -1.1 | Cytoplasm           | enzyme                  |
| RNF126    | ring finger protein 126                                           | <i>RNF126</i>    | -1.1 | Other               | enzyme                  |
| TRIP6     | thyroid hormone receptor interactor 6                             | <i>TRIP6</i>     | -1.1 | Extracellular Space | cytokine                |
| TMEM40    | transmembrane protein 40                                          | <i>TMEM40</i>    | -1.1 | Other               | other                   |
| RANBP9    | RAN binding protein 9                                             | <i>RANBP9</i>    | -1.1 | Nucleus             | other                   |
| DSG4      | desmoglein 4                                                      | <i>Dsg4</i>      | -1.1 | Plasma membrane     | other                   |
| SMTNL2    | smoothelin like 2                                                 | <i>SMTNL2</i>    | -1.2 | Other               | other                   |
| ATP6V0A4  | ATPase H+ transporting V0 subunit a4                              | <i>ATP6V0A4</i>  | -1.2 | Cytoplasm           | transporter             |
| YIF1A     | Yip1 interacting factor homologue A, membrane trafficking protein | <i>YIF1A</i>     | -1.2 | Cytoplasm           | other                   |
| COL5A2    | collagen type V alpha 2 chain                                     | <i>Col5a2</i>    | -1.2 | Extracellular Space | other                   |
| VAC14     | VAC14 component of PIKFYVE complex                                | <i>VAC14</i>     | -1.2 | Cytoplasm           | other                   |
| DHRS3     | dehydrogenase/reductase 3                                         | <i>Dhrs3</i>     | -1.2 | Cytoplasm           | enzyme                  |
| HNRNPAB   | heterogeneous nuclear ribonucleoprotein A/B                       | <i>Hnrnpab</i>   | -1.2 | Nucleus             | enzyme                  |
| CELF4     | CUGBP Elav-like family member 4                                   | <i>Celf4</i>     | -1.2 | Nucleus             | translation regulator   |
| PCNX4     | pecanex 4                                                         | <i>C14orf135</i> | -1.2 | Other               | other                   |
| TM7SF3    | transmembrane 7 superfamily member 3                              | <i>TM7SF3</i>    | -1.2 | Plasma membrane     | other                   |
| HAUS1     | HAUS augmin like complex subunit 1                                | <i>Haus1</i>     | -1.2 | Nucleus             | other                   |
| ZC3H7A    | zinc finger CCCH-type containing 7A                               | <i>ZC3H7A</i>    | -1.2 | Extracellular Space | other                   |
| MEPCE     | methylphosphate capping enzyme                                    | <i>Mepce</i>     | -1.2 | Nucleus             | enzyme                  |
| ATP5F1B   | ATP synthase F1 subunit beta                                      | <i>ATP5B</i>     | -1.2 | Cytoplasm           | transporter             |
| SMOX      | spermine oxidase                                                  | <i>SMOX</i>      | -1.2 | Cytoplasm           | enzyme                  |
| NSF       | N-ethylmaleimide sensitive factor, vesicle fusing ATPase          | <i>Nsf</i>       | -1.2 | Cytoplasm           | transporter             |
| SCAF1     | SR-related CTD associated factor 1                                | <i>SCAF1</i>     | -1.2 | Extracellular Space | other                   |
| SPICE1    | spindle and centriole associated protein 1                        | <i>CCDC52</i>    | -1.2 | Cytoplasm           | other                   |

|                        |                                                                |                 |      |                     |                            |
|------------------------|----------------------------------------------------------------|-----------------|------|---------------------|----------------------------|
| Ttf1                   | transcription termination factor, RNA polymerase I             | <i>Ttf1</i>     | -1.2 | Nucleus             | other                      |
| CBX1                   | chromobox 1                                                    | <i>CBX1</i>     | -1.2 | Nucleus             | transcription regulator    |
| MRPL22                 | mitochondrial ribosomal protein L22                            | <i>MRPL22</i>   | -1.2 | Cytoplasm           | other                      |
| EIF2B4                 | eukaryotic translation initiation factor 2B subunit delta      | <i>EIF2B4</i>   | -1.2 | Cytoplasm           | translation regulator      |
| DNASE1L3               | deoxyribonuclease 1 like 3                                     | <i>DNASE1L3</i> | -1.2 | Nucleus             | enzyme                     |
| HK3                    | hexokinase 3                                                   | <i>HK3</i>      | -1.2 | Cytoplasm           | kinase                     |
| GRSF1                  | G-rich RNA sequence binding factor 1                           | <i>Grsf1</i>    | -1.2 | Cytoplasm           | other                      |
| ZFYVE27                | zinc finger FYVE-type containing 27                            | <i>ZFYVE27</i>  | -1.2 | Plasma membrane     | other                      |
| CTSC                   | cathepsin C                                                    | <i>CTSC</i>     | -1.2 | Cytoplasm           | peptidase                  |
| CLCN4                  | chloride voltage-gated channel 4                               | <i>CLCN4</i>    | -1.2 | Plasma membrane     | ion channel                |
| RAB4B                  | RAB4B, member RAS oncogene family                              | <i>RAB4B</i>    | -1.2 | Plasma membrane     | enzyme                     |
| PGA5 (includes others) | pepsinogen A4                                                  | <i>PGA5</i>     | -1.2 | Extracellular Space | peptidase                  |
| SEC63                  | SEC63 homologue, protein translocation regulator               | <i>SEC63</i>    | -1.2 | Cytoplasm           | transporter                |
| FKBP7                  | FKBP prolyl isomerase 7                                        | <i>FKBP7</i>    | -1.2 | Cytoplasm           | enzyme                     |
| ACTG2                  | actin gamma 2, smooth muscle                                   | <i>Actg2</i>    | -1.2 | Cytoplasm           | other                      |
| PARP16                 | poly(ADP-ribose) polymerase family member 16                   | <i>PARP16</i>   | -1.2 | Cytoplasm           | enzyme                     |
| BSDC1                  | BSD domain containing 1                                        | <i>BSDC1</i>    | -1.2 | Other               | other                      |
| PSMC5                  | proteasome 26S subunit, ATPase 5                               | <i>PSMC5</i>    | -1.2 | Nucleus             | transcription regulator    |
| C10orf88               | chromosome 10 open reading frame 88                            | <i>C10orf88</i> | -1.2 | Other               | enzyme                     |
| CBX7                   | chromobox 7                                                    | <i>CBX7</i>     | -1.2 | Nucleus             | other                      |
| CTCF                   | CCCTC-binding factor                                           | <i>CTCF</i>     | -1.2 | Nucleus             | transcription regulator    |
| QTRT1                  | queuine tRNA-ribosyltransferase catalytic subunit 1            | <i>Qtrt1</i>    | -1.2 | Cytoplasm           | enzyme                     |
| SHC3                   | SHC adaptor protein 3                                          | <i>SHC3</i>     | -1.2 | Cytoplasm           | kinase                     |
| HIPK4                  | homeodomain interacting protein kinase 4                       | <i>HIPK4</i>    | -1.2 | Cytoplasm           | kinase                     |
| NTS                    | neurotensin                                                    | <i>Nts</i>      | -1.2 | Extracellular Space | other                      |
| HIF1A                  | hypoxia inducible factor 1 subunit alpha                       | <i>HIF1A</i>    | -1.2 | Nucleus             | transcription regulator    |
| EXOSC5                 | exosome component 5                                            | <i>EXOSC5</i>   | -1.2 | Nucleus             | enzyme                     |
| PSMA1                  | proteasome 20S subunit alpha 1                                 | <i>PSMA1</i>    | -1.2 | Cytoplasm           | peptidase                  |
| DYNC1LI2               | dynein cytoplasmic 1 light intermediate chain 2                | <i>DYNC1LI2</i> | -1.2 | Cytoplasm           | other                      |
| LRRC1                  | leucine rich repeat containing 1                               | <i>LRRC1</i>    | -1.2 | Cytoplasm           | other                      |
| POLR1G                 | RNA polymerase I subunit G                                     | <i>CD3EAP</i>   | -1.2 | Nucleus             | other                      |
| LPCAT3                 | lysophosphatidylcholine acyltransferase 3                      | <i>Lpcat3</i>   | -1.2 | Plasma membrane     | enzyme                     |
| DPYSL2                 | dihydropyrimidinase like 2                                     | <i>Dpysl2</i>   | -1.2 | Cytoplasm           | enzyme                     |
| RRM2B                  | ribonucleotide reductase regulatory TP53 inducible subunit M2B | <i>Rrm2b</i>    | -1.2 | Nucleus             | enzyme                     |
| PRICKLE4               | prickle planar cell polarity protein 4                         | <i>PRICKLE4</i> | -1.2 | Other               | other                      |
| ICAM3                  | intercellular adhesion molecule 3                              | <i>ICAM3</i>    | -1.2 | Plasma membrane     | transmembrane receptor     |
| BRMS1                  | BRMS1 transcriptional repressor and anoikis regulator          | <i>Brms1</i>    | -1.2 | Nucleus             | transcription regulator    |
| TSEN54                 | tRNA splicing endonuclease subunit 54                          | <i>TSEN54</i>   | -1.2 | Nucleus             | enzyme                     |
| CD40LG                 | CD40 ligand                                                    | <i>CD40LG</i>   | -1.2 | Extracellular Space | cytokine                   |
| LTB4R                  | leukotriene B4 receptor                                        | <i>LTB4R</i>    | -1.2 | Plasma membrane     | G-protein coupled receptor |
| AURKB                  | aurora kinase B                                                | <i>AURKB</i>    | -1.2 | Nucleus             | kinase                     |
| BICD2                  | BICD cargo adaptor 2                                           | <i>BICD2</i>    | -1.2 | Cytoplasm           | other                      |
| GNAI3                  | G protein subunit alpha i3                                     | <i>GNAI3</i>    | -1.2 | Cytoplasm           | enzyme                     |

|         |                                                          |                  |      |                     |                            |
|---------|----------------------------------------------------------|------------------|------|---------------------|----------------------------|
| DGKD    | diacylglycerol kinase delta                              | <i>DGKD</i>      | -1.2 | Cytoplasm           | kinase                     |
| ITGA10  | integrin subunit alpha 10                                | <i>ITGA10</i>    | -1.2 | Plasma membrane     | other                      |
| HBB     | hemoglobin subunit beta                                  | <i>HBB</i>       | -1.2 | Cytoplasm           | transporter                |
| ZNF143  | zinc finger protein 143                                  | <i>ZNF143</i>    | -1.2 | Nucleus             | transcription regulator    |
| SH3GL3  | SH3 domain containing GRB2 like 3, endophilin A3         | <i>SH3GL3</i>    | -1.2 | Cytoplasm           | other                      |
| PPP2R1A | protein phosphatase 2 scaffold subunit Aalpha            | <i>PPP2R1A</i>   | -1.2 | Cytoplasm           | phosphatase                |
| ALDH2   | aldehyde dehydrogenase 2 family member                   | <i>ALDH2</i>     | -1.2 | Cytoplasm           | enzyme                     |
| SUCLA2  | succinate-CoA ligase ADP-forming subunit beta            | <i>SUCLA2</i>    | -1.2 | Cytoplasm           | enzyme                     |
| RNF113A | ring finger protein 113A                                 | <i>RNF113A</i>   | -1.2 | Extracellular Space | enzyme                     |
| TNIP1   | TNFAIP3 interacting protein 1                            | <i>Tnip1</i>     | -1.2 | Nucleus             | other                      |
| PRUNE1  | prune exopolyphosphatase 1                               | <i>PRUNE</i>     | -1.2 | Nucleus             | enzyme                     |
| HSPB2   | heat shock protein family B (small) member 2             | <i>Hspb2</i>     | -1.2 | Cytoplasm           | other                      |
| NOP16   | NOP16 nucleolar protein                                  | <i>NOP16</i>     | -1.2 | Nucleus             | other                      |
| GHR     | growth hormone receptor                                  | <i>GHR</i>       | -1.2 | Plasma membrane     | transmembrane receptor     |
| GPR61   | G protein-coupled receptor 61                            | <i>Gpr61</i>     | -1.2 | Plasma membrane     | G-protein coupled receptor |
| MST1    | macrophage stimulating 1                                 | <i>MST1</i>      | -1.2 | Extracellular Space | growth factor              |
| LYPLA2  | lysophospholipase 2                                      | <i>LYPLA2</i>    | -1.2 | Cytoplasm           | enzyme                     |
| RAD54L2 | RAD54 like 2                                             | <i>RAD54L2</i>   | -1.2 | Nucleus             | transcription regulator    |
| NOL4L   | nucleolar protein 4 like                                 | <i>C20orf112</i> | -1.2 | Other               | other                      |
| EWSR1   | EWS RNA binding protein 1                                | <i>EWSR1</i>     | -1.2 | Nucleus             | other                      |
| OPALIN  | oligodendrocytic myelin paranodal and inner loop protein | <i>OPALIN</i>    | -1.2 | Cytoplasm           | other                      |
| PPP1R3C | protein phosphatase 1 regulatory subunit 3C              | <i>Ppp1r3c</i>   | -1.2 | Cytoplasm           | phosphatase                |
| DNAJB6  | DnaJ heat shock protein family (Hsp40) member B6         | <i>DNAJB6</i>    | -1.2 | Nucleus             | transcription regulator    |
| TRNT1   | tRNA nucleotidyl transferase 1                           | <i>TRNT1</i>     | -1.2 | Cytoplasm           | enzyme                     |
| COX16   | cytochrome c oxidase assembly factor COX16               | <i>COX16</i>     | -1.2 | Cytoplasm           | other                      |
| MYBL2   | MYB proto-oncogene like 2                                | <i>MYBL2</i>     | -1.2 | Nucleus             | transcription regulator    |
| SSX2IP  | SSX family member 2 interacting protein                  | <i>SSX2IP</i>    | -1.2 | Plasma membrane     | other                      |
| KIRREL1 | kirre like nephrin family adhesion molecule 1            | <i>KIRREL</i>    | -1.2 | Plasma membrane     | other                      |
| LMAN1   | lectin, mannose binding 1                                | <i>Lman1</i>     | -1.2 | Cytoplasm           | other                      |
| DOCK2   | dedicator of cytokinesis 2                               | <i>DOCK2</i>     | -1.2 | Cytoplasm           | other                      |
| NTRK1   | neurotrophic receptor tyrosine kinase 1                  | <i>NTRK1</i>     | -1.2 | Plasma membrane     | kinase                     |
| GJA1    | gap junction protein alpha 1                             | <i>GJA1</i>      | -1.2 | Plasma membrane     | transporter                |
| MLH3    | mutL homologue 3                                         | <i>MLH3</i>      | -1.2 | Nucleus             | other                      |
| HSF2BP  | heat shock transcription factor 2 binding protein        | <i>HSF2BP</i>    | -1.2 | Cytoplasm           | other                      |
| ATG13   | autophagy related 13                                     | <i>KIAA0652</i>  | -1.2 | Cytoplasm           | other                      |
| GAS2    | growth arrest specific 2                                 | <i>Gas2</i>      | -1.2 | Cytoplasm           | other                      |
| FAM89B  | family with sequence similarity 89 member B              | <i>FAM89B</i>    | -1.2 | Cytoplasm           | other                      |
| ATF4    | activating transcription factor 4                        | <i>ATF4</i>      | -1.2 | Nucleus             | transcription regulator    |
| GAD2    | glutamate decarboxylase 2                                | <i>GAD2</i>      | -1.2 | Cytoplasm           | enzyme                     |
| LXN     | latexin                                                  | <i>LXN</i>       | -1.2 | Cytoplasm           | other                      |
| SVIL    | supervillin                                              | <i>SVIL</i>      | -1.2 | Plasma membrane     | other                      |
| GKAP1   | G kinase anchoring protein 1                             | <i>Gkap1</i>     | -1.2 | Cytoplasm           | other                      |
| ALDOA   | aldolase, fructose-bisphosphate A                        | <i>ALDOA</i>     | -1.2 | Cytoplasm           | enzyme                     |
| GMDS    | GDP-mannose 4,6-dehydratase                              | <i>Gmids</i>     | -1.2 | Cytoplasm           | enzyme                     |
| ANKRA2  | ankyrin repeat family A member 2                         | <i>ANKRA2</i>    | -1.2 | Cytoplasm           | transcription regulator    |

|           |                                                       |                  |      |                     |                            |
|-----------|-------------------------------------------------------|------------------|------|---------------------|----------------------------|
| ELL3      | elongation factor for RNA polymerase II 3             | <i>ELL3</i>      | -1.2 | Nucleus             | transcription regulator    |
| ZDHHC23   | zinc finger DHHC-type palmitoyltransferase 23         | <i>ZDHHC23</i>   | -1.2 | Other               | other                      |
| NUDT16    | nudix hydrolase 16                                    | <i>Nudt16</i>    | -1.2 | Nucleus             | enzyme                     |
| GABARAPL2 | GABA type A receptor associated protein like 2        | <i>GABARAPL2</i> | -1.2 | Cytoplasm           | other                      |
| NCOA7     | nuclear receptor coactivator 7                        | <i>NCOA7</i>     | -1.2 | Nucleus             | transcription regulator    |
| MOB4      | MOB family member 4, phocein                          | <i>MOBKL3</i>    | -1.2 | Cytoplasm           | other                      |
| PLBD1     | phospholipase B domain containing 1                   | <i>Pldb1</i>     | -1.2 | Cytoplasm           | enzyme                     |
| ELAVL3    | ELAV like RNA binding protein 3                       | <i>ELAVL3</i>    | -1.2 | Nucleus             | other                      |
| R3HDM2    | R3H domain containing 2                               | <i>R3HDM2</i>    | -1.2 | Nucleus             | other                      |
| KRT19     | keratin 19                                            | <i>KRT19</i>     | -1.2 | Cytoplasm           | other                      |
| CDK7      | cyclin dependent kinase 7                             | <i>CDK7</i>      | -1.2 | Nucleus             | kinase                     |
| DDX24     | DEAD-box helicase 24                                  | <i>DDX24</i>     | -1.2 | Nucleus             | enzyme                     |
| PLEKHA4   | pleckstrin homologue domain containing A4             | <i>Plekha4</i>   | -1.2 | Cytoplasm           | other                      |
| GGT5      | gamma-glutamyltransferase 5                           | <i>GGT5</i>      | -1.2 | Plasma membrane     | enzyme                     |
| CD2BP2    | CD2 cytoplasmic tail binding protein 2                | <i>CD2BP2</i>    | -1.2 | Cytoplasm           | other                      |
| ZNF24     | zinc finger protein 24                                | <i>ZNF24</i>     | -1.2 | Nucleus             | transcription regulator    |
| SELENBP1  | selenium binding protein 1                            | <i>SELENBP1</i>  | -1.2 | Cytoplasm           | other                      |
| PRKACA    | protein kinase cAMP-activated catalytic subunit alpha | <i>PRKACA</i>    | -1.2 | Cytoplasm           | kinase                     |
| SRPX2     | sushi repeat containing protein X-linked 2            | <i>SRPX2</i>     | -1.2 | Cytoplasm           | other                      |
| FOXJ2     | forkhead box J2                                       | <i>FOXJ2</i>     | -1.2 | Nucleus             | transcription regulator    |
| CA9       | carbonic anhydrase 9                                  | <i>CA9</i>       | -1.2 | Nucleus             | enzyme                     |
| ACSL5     | acyl-CoA synthetase long chain family member 5        | <i>ACSL5</i>     | -1.2 | Cytoplasm           | enzyme                     |
| USP30     | ubiquitin specific peptidase 30                       | <i>Usp30</i>     | -1.2 | Cytoplasm           | peptidase                  |
| KIAA0825  | KIAA0825                                              | <i>C5orf36</i>   | -1.2 | Extracellular Space | other                      |
| MDK       | midkine                                               | <i>Mdk</i>       | -1.2 | Extracellular Space | growth factor              |
| STXBP1    | syntaxin binding protein 1                            | <i>STXBP1</i>    | -1.2 | Cytoplasm           | transporter                |
| ECD       | ecdysoneless cell cycle regulator                     | <i>ECD</i>       | -1.2 | Nucleus             | transcription regulator    |
| CCDC80    | coiled-coil domain containing 80                      | <i>Ccdc80</i>    | -1.2 | Nucleus             | other                      |
| EXOC2     | exocyst complex component 2                           | <i>Exoc2</i>     | -1.2 | Cytoplasm           | transporter                |
| SCAMP1    | secretory carrier membrane protein 1                  | <i>SCAMP1</i>    | -1.2 | Cytoplasm           | transporter                |
| TDRD3     | tudor domain containing 3                             | <i>TDRD3</i>     | -1.2 | Nucleus             | transcription regulator    |
| KLHL3     | kelch like family member 3                            | <i>KLHL3</i>     | -1.2 | Cytoplasm           | other                      |
| NCF4      | neutrophil cytosolic factor 4                         | <i>Ncf4</i>      | -1.2 | Cytoplasm           | enzyme                     |
| DOK1      | docking protein 1                                     | <i>Dok1</i>      | -1.2 | Plasma membrane     | kinase                     |
| PRCC      | proline rich mitotic checkpoint control factor        | <i>PRCC</i>      | -1.2 | Nucleus             | other                      |
| MYO1B     | myosin IB                                             | <i>MYO1B</i>     | -1.2 | Cytoplasm           | other                      |
| EGR4      | early growth response 4                               | <i>Egr4</i>      | -1.2 | Nucleus             | transcription regulator    |
| FREM1     | FRAS1 related extracellular matrix 1                  | <i>FREM1</i>     | -1.2 | Extracellular Space | other                      |
| EML3      | EMAP like 3                                           | <i>EML3</i>      | -1.2 | Cytoplasm           | other                      |
| CXCL12    | C-X-C motif chemokine ligand 12                       | <i>CXCL12</i>    | -1.2 | Extracellular Space | cytokine                   |
| ADGRB2    | adhesion G protein-coupled receptor B2                | <i>BAI2</i>      | -1.2 | Plasma membrane     | G-protein coupled receptor |
| STK3      | serine/threonine kinase 3                             | <i>Stk3</i>      | -1.2 | Cytoplasm           | kinase                     |
| ACTR1A    | actin related protein 1A                              | <i>ACTR1A</i>    | -1.2 | Cytoplasm           | other                      |
| TAF11     | TATA-box binding protein associated factor 11         | <i>TAF11</i>     | -1.2 | Nucleus             | transcription regulator    |

|          |                                                                    |                 |      |                     |                            |
|----------|--------------------------------------------------------------------|-----------------|------|---------------------|----------------------------|
| NEU3     | neuraminidase 3                                                    | <i>Neu3</i>     | -1.2 | Plasma membrane     | enzyme                     |
| UBE2E3   | ubiquitin conjugating enzyme E2 E3                                 | <i>Ube2e3</i>   | -1.2 | Nucleus             | enzyme                     |
| TLE1     | TLE family member 1, transcriptional corepressor                   | <i>TLE1</i>     | -1.2 | Nucleus             | transcription regulator    |
| TIMM17B  | translocase of inner mitochondrial membrane 17B                    | <i>TIMM17B</i>  | -1.2 | Cytoplasm           | transporter                |
| ALDH18A1 | aldehyde dehydrogenase 18 family member A1                         | <i>ALDH18A1</i> | -1.2 | Cytoplasm           | kinase                     |
| IGFBP5   | insulin like growth factor binding protein 5                       | <i>IGFBP5</i>   | -1.2 | Extracellular Space | other                      |
| EVC2     | EvC ciliary complex subunit 2                                      | <i>EVC2</i>     | -1.2 | Extracellular Space | other                      |
| DDRGK1   | DDRGK domain containing 1                                          | <i>DDRGK1</i>   | -1.2 | Extracellular Space | other                      |
| PSMD1    | proteasome 26S subunit, non-ATPase 1                               | <i>PSMD1</i>    | -1.2 | Cytoplasm           | other                      |
| ZDHHC18  | zinc finger DHHC-type palmitoyltransferase 18                      | <i>ZDHHC18</i>  | -1.2 | Cytoplasm           | enzyme                     |
| HSPD1    | heat shock protein family D (Hsp60) member 1                       | <i>HSPD1</i>    | -1.2 | Cytoplasm           | enzyme                     |
| MIDEAS   | mitotic deacetylase associated SANT domain protein                 | <i>C14orf43</i> | -1.2 | Nucleus             | transcription regulator    |
| CXXC5    | CXXC finger protein 5                                              | <i>CXXC5</i>    | -1.2 | Nucleus             | other                      |
| FBXO6    | F-box protein 6                                                    | <i>FBXO6</i>    | -1.2 | Cytoplasm           | other                      |
| TPCN1    | two pore segment channel 1                                         | <i>Tpcn1</i>    | -1.2 | Plasma membrane     | ion channel                |
| CHGA     | chromogranin A                                                     | <i>CHGA</i>     | -1.2 | Cytoplasm           | other                      |
| CCNH     | cyclin H                                                           | <i>CCNH</i>     | -1.2 | Nucleus             | transcription regulator    |
| RSRC1    | arginine and serine rich coiled-coil 1                             | <i>RSRC1</i>    | -1.2 | Nucleus             | other                      |
| SLC35C2  | solute carrier family 35 member C2                                 | <i>SLC35C2</i>  | -1.2 | Cytoplasm           | transporter                |
| ARID1B   | AT-rich interaction domain 1B                                      | <i>ARID1B</i>   | -1.2 | Nucleus             | transcription regulator    |
| TNC      | tenascin C                                                         | <i>TNC</i>      | -1.2 | Extracellular Space | other                      |
| AP3B2    | adaptor related protein complex 3 subunit beta 2                   | <i>AP3B2</i>    | -1.2 | Cytoplasm           | other                      |
| LTBR     | lymphotoxin beta receptor                                          | <i>LTBR</i>     | -1.2 | Plasma membrane     | transmembrane receptor     |
| WWC2     | WW and C2 domain containing 2                                      | <i>Wwc2</i>     | -1.2 | Cytoplasm           | other                      |
| GK       | glycerol kinase                                                    | <i>GK</i>       | -1.2 | Cytoplasm           | kinase                     |
| LCAT     | lecithin-cholesterol acyltransferase                               | <i>LCAT</i>     | -1.2 | Extracellular Space | enzyme                     |
| MCM7     | minichromosome maintenance complex component 7                     | <i>MCM7</i>     | -1.2 | Nucleus             | enzyme                     |
| LGALS1   | galectin 1                                                         | <i>LGALS1</i>   | -1.2 | Extracellular Space | other                      |
| WNT5A    | Wnt family member 5A                                               | <i>WNT5A</i>    | -1.2 | Extracellular Space | cytokine                   |
| KHDRBS3  | KH RNA binding domain containing, signal transduction associated 3 | <i>KHDRBS3</i>  | -1.2 | Nucleus             | other                      |
| SLC39A2  | solute carrier family 39 member 2                                  | <i>SLC39A2</i>  | -1.2 | Plasma membrane     | transporter                |
| MYG1     | MYG1 exonuclease                                                   | <i>C12orf10</i> | -1.2 | Nucleus             | other                      |
| ELOVL5   | ELOVL fatty acid elongase 5                                        | <i>Elov5</i>    | -1.2 | Cytoplasm           | enzyme                     |
| MPZ      | myelin protein zero                                                | <i>MPZ</i>      | -1.2 | Plasma membrane     | other                      |
| ALDH1A3  | aldehyde dehydrogenase 1 family member A3                          | <i>ALDH1A3</i>  | -1.2 | Cytoplasm           | enzyme                     |
| P2RY6    | pyrimidinergic receptor P2Y6                                       | <i>P2ry6</i>    | -1.2 | Plasma membrane     | G-protein coupled receptor |
| TXLNG    | taxilin gamma                                                      | <i>CXorf15</i>  | -1.2 | Nucleus             | other                      |
| DTNA     | dystrobrevin alpha                                                 | <i>Dtna</i>     | -1.2 | Plasma membrane     | other                      |
| OSBPL2   | oxysterol binding protein like 2                                   | <i>OSBPL2</i>   | -1.2 | Cytoplasm           | transporter                |
| CWF19L1  | CWF19 like cell cycle control factor 1                             | <i>CWF19L1</i>  | -1.2 | Other               | other                      |



|          |                                                                               |                 |      |                     |                         |
|----------|-------------------------------------------------------------------------------|-----------------|------|---------------------|-------------------------|
| MEIS1    | Meis homeobox 1                                                               | <i>MEIS1</i>    | -1.2 | Nucleus             | transcription regulator |
| CTDSP2   | CTD small phosphatase 2                                                       | <i>CTDSP2</i>   | -1.2 | Nucleus             | phosphatase             |
| DHDDS    | dehydrodolichyl diphosphate synthase subunit                                  | <i>DHDDS</i>    | -1.2 | Cytoplasm           | enzyme                  |
| GANAB    | glucosidase II alpha subunit                                                  | <i>GANAB</i>    | -1.2 | Cytoplasm           | enzyme                  |
| SYNGR3   | synaptogyrin 3                                                                | <i>Syng3</i>    | -1.2 | Plasma membrane     | other                   |
| FBXL6    | F-box and leucine rich repeat protein 6                                       | <i>FBXL6</i>    | -1.2 | Other               | enzyme                  |
| CAMKK1   | calcium/calmodulin dependent protein kinase kinase 1                          | <i>Camkk1</i>   | -1.2 | Cytoplasm           | kinase                  |
| TRAF3    | TNF receptor associated factor 3                                              | <i>TRAF3</i>    | -1.2 | Cytoplasm           | enzyme                  |
| CITED2   | Cbp/p3 interacting transactivator with Glu/Asp rich carboxy-terminal domain 2 | <i>Cited2</i>   | -1.2 | Nucleus             | transcription regulator |
| NDUFS4   | NADH:ubiquinone oxidoreductase subunit S4                                     | <i>NDUFS4</i>   | -1.2 | Cytoplasm           | enzyme                  |
| RGS14    | regulator of G protein signaling 14                                           | <i>RGS14</i>    | -1.2 | Cytoplasm           | enzyme                  |
| MAGOH    | mago homologue, exon junction complex subunit                                 | <i>MAGOH</i>    | -1.2 | Nucleus             | other                   |
| DDX28    | DEAD-box helicase 28                                                          | <i>Ddx28</i>    | -1.2 | Nucleus             | enzyme                  |
| AMOTL2   | angiominin like 2                                                             | <i>Amotl2</i>   | -1.2 | Plasma membrane     | other                   |
| EIF3M    | eukaryotic translation initiation factor 3 subunit M                          | <i>EIF3M</i>    | -1.2 | Cytoplasm           | translation regulator   |
| SLC12A2  | solute carrier family 12 member 2                                             | <i>SLC12A2</i>  | -1.2 | Plasma membrane     | transporter             |
| CHI3L1   | chitinase 3 like 1                                                            | <i>CHI3L1</i>   | -1.2 | Extracellular Space | enzyme                  |
| SIA1     | S1 calcium binding protein A1                                                 | <i>SIA1</i>     | -1.2 | Cytoplasm           | other                   |
| VAV3     | vav guanine nucleotide exchange factor 3                                      | <i>VAV3</i>     | -1.2 | Extracellular Space | cytokine                |
| PIGU     | phosphatidylinositol glycan anchor biosynthesis class U                       | <i>PIGU</i>     | -1.2 | Cytoplasm           | enzyme                  |
| PTMA     | prothymosin alpha                                                             | <i>PTMA</i>     | -1.2 | Nucleus             | other                   |
| MKRN3    | makorin ring finger protein 3                                                 | <i>Mkrn3</i>    | -1.2 | Nucleus             | enzyme                  |
| ZNF18    | zinc finger protein 18                                                        | <i>ZNF18</i>    | -1.2 | Nucleus             | transcription regulator |
| DCTN2    | dynactin subunit 2                                                            | <i>DCTN2</i>    | -1.2 | Cytoplasm           | other                   |
| BTD      | biotinidase                                                                   | <i>BTD</i>      | -1.2 | Extracellular Space | enzyme                  |
| COQ9     | coenzyme Q9                                                                   | <i>Coq9</i>     | -1.2 | Cytoplasm           | other                   |
| MYOT     | myotilin                                                                      | <i>MYOT</i>     | -1.2 | Cytoplasm           | other                   |
| ZDHHC4   | zinc finger DHHC-type palmitoyltransferase 4                                  | <i>ZDHHC4</i>   | -1.2 | Cytoplasm           | other                   |
| BACE1    | beta-secretase 1                                                              | <i>BACE1</i>    | -1.2 | Cytoplasm           | peptidase               |
| SCAMP5   | secretory carrier membrane protein 5                                          | <i>Scamp5</i>   | -1.2 | Cytoplasm           | other                   |
| ARHGAP29 | Rho GTPase activating protein 29                                              | <i>ARHGAP29</i> | -1.2 | Cytoplasm           | other                   |
| ODC1     | ornithine decarboxylase 1                                                     | <i>ODC1</i>     | -1.2 | Cytoplasm           | enzyme                  |
| GYS1     | glycogen synthase 1                                                           | <i>GYS1</i>     | -1.2 | Cytoplasm           | enzyme                  |
| BBC3     | BCL2 binding component 3                                                      | <i>BBC3</i>     | -1.2 | Cytoplasm           | other                   |
| METTL9   | methyltransferase like 9                                                      | <i>METTL9</i>   | -1.2 | Cytoplasm           | enzyme                  |
| CNOT4    | CCR4-NOT transcription complex subunit 4                                      | <i>CNOT4</i>    | -1.2 | Cytoplasm           | enzyme                  |
| ITGB3    | integrin subunit beta 3                                                       | <i>ITGB3</i>    | -1.2 | Plasma membrane     | transmembrane receptor  |
| TP53BP1  | tumor protein p53 binding protein 1                                           | <i>TP53BP1</i>  | -1.2 | Nucleus             | transcription regulator |
| PSEN1    | presenilin 1                                                                  | <i>Psen1</i>    | -1.2 | Plasma membrane     | peptidase               |
| SLC4A2   | solute carrier family 4 member 2                                              | <i>SLC4A2</i>   | -1.2 | Plasma membrane     | transporter             |
| COL6A3   | collagen type VI alpha 3 chain                                                | <i>Col6a3</i>   | -1.2 | Extracellular Space | other                   |
| PHB2     | prohibitin 2                                                                  | <i>PHB2</i>     | -1.2 | Cytoplasm           | transcription regulator |
| P4HA2    | prolyl 4-hydroxylase subunit alpha 2                                          | <i>P4HA2</i>    | -1.2 | Cytoplasm           | transporter             |

|                |                                                                |                 |      |                     |                         |
|----------------|----------------------------------------------------------------|-----------------|------|---------------------|-------------------------|
| PAOX           | polyamine oxidase                                              | <i>PAOX</i>     | -1.3 | Cytoplasm           | enzyme                  |
| RPS5           | ribosomal protein S5                                           | <i>Rps5</i>     | -1.3 | Cytoplasm           | other                   |
| SORL1          | sortilin related receptor 1                                    | <i>SORL1</i>    | -1.3 | Cytoplasm           | transporter             |
| SH3GLB2        | SH3 domain containing GRB2 like, endophilin B2                 | <i>Sh3glb2</i>  | -1.3 | Cytoplasm           | other                   |
| SPAST          | spastin                                                        | <i>SPAST</i>    | -1.3 | Nucleus             | enzyme                  |
| CTSG           | cathepsin G                                                    | <i>CTSG</i>     | -1.3 | Cytoplasm           | peptidase               |
| CPEB1          | cytoplasmic polyadenylation element binding protein 1          | <i>CPEB1</i>    | -1.3 | Cytoplasm           | translation regulator   |
| DNAJC22        | DnaJ heat shock protein family (Hsp40) member C22              | <i>DNAJC22</i>  | -1.3 | Other               | other                   |
| B4GALT7        | beta-1,4-galactosyltransferase 7                               | <i>B4GALT7</i>  | -1.3 | Cytoplasm           | enzyme                  |
| LEO1           | LEO1 homologue, Paf1/RNA polymerase II complex component       | <i>LEO1</i>     | -1.3 | Nucleus             | other                   |
| MARCKSL1       | MARCKS like 1                                                  | <i>MARCKSL1</i> | -1.3 | Cytoplasm           | other                   |
| TCP1           | t-complex 1                                                    | <i>TCP1</i>     | -1.3 | Cytoplasm           | other                   |
| HEBP2          | heme binding protein 2                                         | <i>HEBP2</i>    | -1.3 | Cytoplasm           | other                   |
| NSMCE4A        | NSE4 homologue A, SMC5-SMC6 complex component                  | <i>NSMCE4A</i>  | -1.3 | Nucleus             | other                   |
| GLG1           | golgi glycoprotein 1                                           | <i>GLG1</i>     | -1.3 | Cytoplasm           | other                   |
| TRIAP1         | TP53 regulated inhibitor of apoptosis 1                        | <i>TRIAP1</i>   | -1.3 | Cytoplasm           | other                   |
| LRRCC1         | leucine rich repeat and coiled-coil centrosomal protein 1      | <i>LRRCC1</i>   | -1.3 | Nucleus             | transporter             |
| SH2D1A         | SH2 domain containing 1A                                       | <i>Sh2d1a</i>   | -1.3 | Cytoplasm           | other                   |
| FBXW11         | F-box and WD repeat domain containing 11                       | <i>Fbxw11</i>   | -1.3 | Cytoplasm           | enzyme                  |
| HMGNI          | high mobility group nucleosome binding domain 1                | <i>HMGNI</i>    | -1.3 | Nucleus             | transcription regulator |
| ALOX5          | arachidonate 5-lipoxygenase                                    | <i>ALOX5</i>    | -1.3 | Cytoplasm           | enzyme                  |
| APOB           | apolipoprotein B                                               | <i>ApoB</i>     | -1.3 | Extracellular Space | transporter             |
| EFHC2          | EF-hand domain containing 2                                    | <i>EFHC2</i>    | -1.3 | Cytoplasm           | other                   |
| SLC38A11       | solute carrier family 38 member 11                             | <i>SLC38A11</i> | -1.3 | Other               | transporter             |
| G3BP2          | G3BP stress granule assembly factor 2                          | <i>G3BP2</i>    | -1.3 | Cytoplasm           | enzyme                  |
| NRXN2          | neurexin 2                                                     | <i>NRXN2</i>    | -1.3 | Plasma membrane     | transporter             |
| NUP85          | nucleoporin 85                                                 | <i>NUP85</i>    | -1.3 | Cytoplasm           | other                   |
| AAMP           | angio associated migratory cell protein                        | <i>AAMP</i>     | -1.3 | Plasma membrane     | other                   |
| DHX40          | DEAH-box helicase 40                                           | <i>DHX40</i>    | -1.3 | Other               | enzyme                  |
| IDH3B          | isocitrate dehydrogenase (NAD(+)) 3 non-catalytic subunit beta | <i>IDH3B</i>    | -1.3 | Cytoplasm           | enzyme                  |
| RASGRP4        | RAS guanyl releasing protein 4                                 | <i>RASGRP4</i>  | -1.3 | Cytoplasm           | other                   |
| IFI27L2        | interferon alpha inducible protein 27 like 2                   | <i>IFI27L2</i>  | -1.3 | Cytoplasm           | other                   |
| RIPK2          | receptor interacting serine/threonine kinase 2                 | <i>RIPK2</i>    | -1.3 | Plasma membrane     | kinase                  |
| UROD           | uroporphyrinogen decarboxylase                                 | <i>Urod</i>     | -1.3 | Cytoplasm           | enzyme                  |
| MAGED4/MAGED4B | MAGE family member D4B                                         | <i>MAGED4</i>   | -1.3 | Other               | other                   |
| TMEM94         | transmembrane protein 94                                       | <i>KIAA0195</i> | -1.3 | Extracellular Space | other                   |
| PAPOLA         | poly(A) polymerase alpha                                       | <i>Papola</i>   | -1.3 | Nucleus             | enzyme                  |
| TMEM42         | transmembrane protein 42                                       | <i>TMEM42</i>   | -1.3 | Other               | other                   |
| PEX14          | peroxisomal biogenesis factor 14                               | <i>Pex14</i>    | -1.3 | Cytoplasm           | transcription regulator |
| ARHGDI1A       | Rho GDP dissociation inhibitor alpha                           | <i>ARHGDI1A</i> | -1.3 | Cytoplasm           | other                   |
| FIS1           | fission, mitochondrial 1                                       | <i>FIS1</i>     | -1.3 | Cytoplasm           | other                   |
| POGZ           | pogo transposable element derived with ZNF domain              | <i>POGZ</i>     | -1.3 | Nucleus             | enzyme                  |
| CMTM8          | CKLF like MARVEL transmembrane domain containing 8             | <i>CMTM8</i>    | -1.3 | Extracellular Space | cytokine                |
| TRIP4          | thyroid hormone receptor interactor 4                          | <i>TRIP4</i>    | -1.3 | Nucleus             | transcription regulator |
| PPP6C          | protein phosphatase 6 catalytic subunit                        | <i>PPP6C</i>    | -1.3 | Nucleus             | phosphatase             |

|          |                                                              |                 |      |                     |                         |
|----------|--------------------------------------------------------------|-----------------|------|---------------------|-------------------------|
| UPF2     | UPF2 regulator of nonsense mediated mRNA decay               | <i>Upf2</i>     | -1.3 | Cytoplasm           | other                   |
| SERTAD1  | SERTA domain containing 1                                    | <i>Sertad1</i>  | -1.3 | Nucleus             | transcription regulator |
| PMEL     | premelanosome protein                                        | <i>SILV</i>     | -1.3 | Plasma membrane     | enzyme                  |
| CHCHD1   | coiled-coil-helix-coiled-coil-helix domain containing 1      | <i>Chchd1</i>   | -1.3 | Nucleus             | other                   |
| MEN1     | menin 1                                                      | <i>MEN1</i>     | -1.3 | Nucleus             | transcription regulator |
| RPLP2    | ribosomal protein lateral stalk subunit P2                   | <i>Rplp2</i>    | -1.3 | Cytoplasm           | other                   |
| MLH1     | mutL homologue 1                                             | <i>MLH1</i>     | -1.3 | Nucleus             | enzyme                  |
| LDB1     | LIM domain binding 1                                         | <i>LDB1</i>     | -1.3 | Nucleus             | transcription regulator |
| POU4F1   | POU class 4 homeobox 1                                       | <i>POU4F1</i>   | -1.3 | Nucleus             | transcription regulator |
| FAM184A  | family with sequence similarity 184 member A                 | <i>FAM184A</i>  | -1.3 | Extracellular Space | other                   |
| HOXC10   | homeobox C10                                                 | <i>HOXC10</i>   | -1.3 | Nucleus             | transcription regulator |
| ERAP2    | endoplasmic reticulum aminopeptidase 2                       | <i>ERAP2</i>    | -1.3 | Cytoplasm           | peptidase               |
| LAMB1    | laminin subunit beta 1                                       | <i>LAMB1</i>    | -1.3 | Extracellular Space | other                   |
| BBX      | BBX high mobility group box domain containing                | <i>Bbx</i>      | -1.3 | Nucleus             | transcription regulator |
| DICER1   | dicer 1, ribonuclease III                                    | <i>DICER1</i>   | -1.3 | Cytoplasm           | enzyme                  |
| SYF2     | SYF2 pre-mRNA splicing factor                                | <i>Syf2</i>     | -1.3 | Nucleus             | other                   |
| HSPB8    | heat shock protein family B (small) member 8                 | <i>HSPB8</i>    | -1.3 | Cytoplasm           | kinase                  |
| CFL2     | cofilin 2                                                    | <i>Cfl2</i>     | -1.3 | Extracellular Space | other                   |
| CASP3    | caspase 3                                                    | <i>Casp3</i>    | -1.3 | Cytoplasm           | peptidase               |
| LIPT1    | lipoyltransferase 1                                          | <i>LIPT1</i>    | -1.3 | Cytoplasm           | enzyme                  |
| MET      | MET proto-oncogene, receptor tyrosine kinase                 | <i>MET</i>      | -1.3 | Plasma membrane     | kinase                  |
| SRM      | spermidine synthase                                          | <i>SRM</i>      | -1.3 | Cytoplasm           | enzyme                  |
| NSRP1    | nuclear speckle splicing regulatory protein 1                | <i>CCDC55</i>   | -1.3 | Nucleus             | other                   |
| GTF3A    | general transcription factor IIIA                            | <i>GTF3A</i>    | -1.3 | Nucleus             | transcription regulator |
| CALCOCO1 | calcium binding and coiled-coil domain 1                     | <i>CALCOCO1</i> | -1.3 | Nucleus             | transcription regulator |
| BCL7C    | BAF chromatin remodeling complex subunit BCL7C               | <i>Bcl7c</i>    | -1.3 | Nucleus             | other                   |
| ASCC2    | activating signal cointegrator 1 complex subunit 2           | <i>ASCC2</i>    | -1.3 | Nucleus             | other                   |
| TCP11    | t-complex 11                                                 | <i>Tcp11</i>    | -1.3 | Cytoplasm           | other                   |
| TMCO6    | transmembrane and coiled-coil domains 6                      | <i>TMCO6</i>    | -1.3 | Other               | other                   |
| CLTC     | clathrin heavy chain                                         | <i>CLTC</i>     | -1.3 | Plasma membrane     | other                   |
| DNAJC27  | DnaJ heat shock protein family (Hsp40) member C27            | <i>DNAJC27</i>  | -1.3 | Cytoplasm           | enzyme                  |
| TRAP1    | TNF receptor associated protein 1                            | <i>Trap1</i>    | -1.3 | Cytoplasm           | enzyme                  |
| TEP1     | telomerase associated protein 1                              | <i>TEP1</i>     | -1.3 | Nucleus             | enzyme                  |
| MFNG     | MFNG O-fucosylpeptide 3-beta-N-acetylglucosaminyltransferase | <i>MFNG</i>     | -1.3 | Cytoplasm           | enzyme                  |
| CUEDC1   | CUE domain containing 1                                      | <i>CUEDC1</i>   | -1.3 | Other               | other                   |
| FAM214B  | family with sequence similarity 214 member B                 | <i>KIAA1539</i> | -1.3 | Nucleus             | other                   |
| EPHX2    | epoxide hydrolase 2                                          | <i>Ephx2</i>    | -1.3 | Cytoplasm           | enzyme                  |
| COQ10A   | coenzyme Q10A                                                | <i>COQ10A</i>   | -1.3 | Cytoplasm           | other                   |
| VAV1     | vav guanine nucleotide exchange factor 1                     | <i>VAV1</i>     | -1.3 | Nucleus             | transcription regulator |
| BRWD1    | bromodomain and WD repeat domain containing 1                | <i>BRWD1</i>    | -1.3 | Nucleus             | transcription regulator |
| ZNF607   | zinc finger protein 607                                      | <i>ZNF607</i>   | -1.3 | Nucleus             | transcription regulator |

|                        |                                                                            |                |      |                     |                         |
|------------------------|----------------------------------------------------------------------------|----------------|------|---------------------|-------------------------|
| STRADA                 | STE20 related adaptor alpha                                                | <i>STRADA</i>  | -1.3 | Nucleus             | kinase                  |
| AVP11                  | arginine vasopressin induced 1                                             | <i>AVP11</i>   | -1.3 | Other               | other                   |
| ITPRID2                | ITPR interacting domain containing 2                                       | <i>SSFA2</i>   | -1.3 | Plasma membrane     | other                   |
| RBM6                   | RNA binding motif protein 6                                                | <i>RBM6</i>    | -1.3 | Nucleus             | other                   |
| CPSF1                  | cleavage and polyadenylation specific factor 1                             | <i>CPSF1</i>   | -1.3 | Nucleus             | other                   |
| NFIB                   | nuclear factor I B                                                         | <i>NFIB</i>    | -1.3 | Nucleus             | transcription regulator |
| C1QTNF2                | C1q and TNF related 2                                                      | <i>C1QTNF2</i> | -1.3 | Extracellular Space | other                   |
| MUS81                  | MUS81 structure-specific endonuclease subunit                              | <i>MUS81</i>   | -1.3 | Nucleus             | enzyme                  |
| FOXF1                  | forkhead box F1                                                            | <i>FOXF1</i>   | -1.3 | Nucleus             | transcription regulator |
| MICAL1                 | microtubule associated monooxygenase, calponin and LIM domain containing 1 | <i>MICAL1</i>  | -1.3 | Cytoplasm           | enzyme                  |
| SEC24B                 | SEC24 homologue B, COPII coat complex component                            | <i>SEC24B</i>  | -1.3 | Cytoplasm           | transporter             |
| ARMCX5-GPRASP2/GPRASP2 | G protein-coupled receptor associated sorting protein 2                    | <i>GPRASP2</i> | -1.3 | Plasma membrane     | other                   |
| RRAS2                  | RAS related 2                                                              | <i>RRAS2</i>   | -1.3 | Plasma membrane     | enzyme                  |
| PIR                    | pirin                                                                      | <i>PIR</i>     | -1.3 | Nucleus             | transcription regulator |
| COG5                   | component of oligomeric golgi complex 5                                    | <i>COG5</i>    | -1.3 | Cytoplasm           | transporter             |
| ARID4B                 | AT-rich interaction domain 4B                                              | <i>ARID4B</i>  | -1.3 | Nucleus             | transcription regulator |
| Zranb2                 | zinc finger, RAN-binding domain containing 2                               | <i>Zranb2</i>  | -1.3 | Nucleus             | other                   |
| CNBP                   | CCHC-type zinc finger nucleic acid binding protein                         | <i>CNBP</i>    | -1.3 | Nucleus             | transcription regulator |
| C1QTNF7                | C1q and TNF related 7                                                      | <i>C1qtnf7</i> | -1.3 | Extracellular Space | other                   |
| ABI3BP                 | ABI family member 3 binding protein                                        | <i>ABI3BP</i>  | -1.3 | Extracellular Space | other                   |
| MRPL19                 | mitochondrial ribosomal protein L19                                        | <i>MRPL19</i>  | -1.3 | Cytoplasm           | other                   |
| ZDHHC13                | zinc finger DHHC-type palmitoyltransferase 13                              | <i>ZDHHC13</i> | -1.3 | Nucleus             | transcription regulator |
| DNMT3A                 | DNA methyltransferase 3 alpha                                              | <i>DNMT3A</i>  | -1.3 | Nucleus             | enzyme                  |
| CLTB                   | clathrin light chain B                                                     | <i>Cltb</i>    | -1.3 | Plasma membrane     | other                   |
| PAK1IP1                | PAK1 interacting protein 1                                                 | <i>PAK1IP1</i> | -1.3 | Nucleus             | other                   |
| ZNF182                 | zinc finger protein 182                                                    | <i>ZNF182</i>  | -1.3 | Nucleus             | transcription regulator |
| CXXC1                  | CXXC finger protein 1                                                      | <i>Cxxc1</i>   | -1.3 | Nucleus             | transcription regulator |
| NSD1                   | nuclear receptor binding SET domain protein 1                              | <i>NSD1</i>    | -1.3 | Nucleus             | transcription regulator |
| GALK1                  | galactokinase 1                                                            | <i>Galk1</i>   | -1.3 | Cytoplasm           | kinase                  |
| LHFPL6                 | LHFPL tetraspan subfamily member 6                                         | <i>LHFPL6</i>  | -1.3 | Other               | other                   |
| OSBPL8                 | oxysterol binding protein like 8                                           | <i>OSBPL8</i>  | -1.3 | Plasma membrane     | transporter             |
| TAC1                   | tachykinin precursor 1                                                     | <i>TAC1</i>    | -1.3 | Extracellular Space | other                   |
| NCALD                  | neurocalcin delta                                                          | <i>NCALD</i>   | -1.3 | Cytoplasm           | other                   |
| BANF1                  | BAF nuclear assembly factor 1                                              | <i>BANF1</i>   | -1.3 | Nucleus             | other                   |
| SRGAP3                 | SLIT-ROBO Rho GTPase activating protein 3                                  | <i>SRGAP3</i>  | -1.3 | Cytoplasm           | other                   |
| RASSF2                 | Ras association domain family member 2                                     | <i>RASSF2</i>  | -1.3 | Nucleus             | kinase                  |
| FOXO3                  | forkhead box O3                                                            | <i>FOXO3</i>   | -1.3 | Nucleus             | transcription regulator |
| WBP11                  | WW domain binding protein 11                                               | <i>WBP11</i>   | -1.3 | Nucleus             | phosphatase             |
| KMT2E                  | lysine methyltransferase 2E (inactive)                                     | <i>MLL5</i>    | -1.3 | Nucleus             | enzyme                  |
| GTF2A2                 | general transcription factor IIA subunit 2                                 | <i>Gtf2a2</i>  | -1.3 | Nucleus             | transcription regulator |

|          |                                                                 |                 |      |                     |                            |
|----------|-----------------------------------------------------------------|-----------------|------|---------------------|----------------------------|
| HERC2    | HECT and RLD domain containing E3 ubiquitin protein ligase 2    | <i>HERC2</i>    | -1.3 | Cytoplasm           | enzyme                     |
| LRRC57   | leucine rich repeat containing 57                               | <i>Lrrc57</i>   | -1.3 | Cytoplasm           | other                      |
| COPS3    | COP9 signalosome subunit 3                                      | <i>Cops3</i>    | -1.3 | Cytoplasm           | other                      |
| STK4     | serine/threonine kinase 4                                       | <i>STK4</i>     | -1.3 | Cytoplasm           | kinase                     |
| MTRF1    | mitochondrial translation release factor 1                      | <i>MTRF1</i>    | -1.3 | Cytoplasm           | translation regulator      |
| SEPHS2   | selenophosphate synthetase 2                                    | <i>SEPHS2</i>   | -1.3 | Cytoplasm           | enzyme                     |
| S1G      | S1 calcium binding protein G                                    | <i>S1G</i>      | -1.3 | Cytoplasm           | other                      |
| THOC6    | THO complex 6                                                   | <i>THOC6</i>    | -1.3 | Nucleus             | other                      |
| HTR4     | 5-hydroxytryptamine receptor 4                                  | <i>HTR4</i>     | -1.3 | Plasma membrane     | G-protein coupled receptor |
| HR       | HR lysine demethylase and nuclear receptor corepressor          | <i>HR</i>       | -1.3 | Nucleus             | transcription regulator    |
| GRAP2    | GRB2 related adaptor protein 2                                  | <i>GRAP2</i>    | -1.3 | Cytoplasm           | other                      |
| RNF41    | ring finger protein 41                                          | <i>Rnf41</i>    | -1.3 | Cytoplasm           | enzyme                     |
| ANXA1    | annexin A1                                                      | <i>ANXA1</i>    | -1.3 | Plasma membrane     | enzyme                     |
| FBLN1    | fibulin 1                                                       | <i>FBLN1</i>    | -1.3 | Extracellular Space | other                      |
| SELENOW  | selenoprotein W                                                 | <i>SEPW1</i>    | -1.3 | Cytoplasm           | enzyme                     |
| SIPA1L1  | signal induced proliferation associated 1 like 1                | <i>SIPA1L1</i>  | -1.3 | Cytoplasm           | other                      |
| NUDCD2   | NudC domain containing 2                                        | <i>NUDCD2</i>   | -1.3 | Cytoplasm           | other                      |
| GNG3     | G protein subunit gamma 3                                       | <i>GNG3</i>     | -1.3 | Plasma membrane     | enzyme                     |
| GGH      | gamma-glutamyl hydrolase                                        | <i>GGH</i>      | -1.3 | Cytoplasm           | peptidase                  |
| DCAF4    | DDB1 and CUL4 associated factor 4                               | <i>DCAF4</i>    | -1.3 | Nucleus             | other                      |
| PLPP6    | phospholipid phosphatase 6                                      | <i>PPAPDC2</i>  | -1.3 | Plasma membrane     | phosphatase                |
| APIAR    | adaptor related protein complex 1 associated regulatory protein | <i>APIAR</i>    | -1.3 | Cytoplasm           | other                      |
| ZNF8     | zinc finger protein 8                                           | <i>ZNF8</i>     | -1.3 | Other               | other                      |
| ZNF180   | zinc finger protein 180                                         | <i>ZNF180</i>   | -1.4 | Nucleus             | transcription regulator    |
| GSTA4    | glutathione S-transferase alpha 4                               | <i>GSTA4</i>    | -1.4 | Cytoplasm           | enzyme                     |
| CDC42EP3 | CDC42 effector protein 3                                        | <i>CDC42EP3</i> | -1.4 | Cytoplasm           | other                      |
| PHLDB2   | pleckstrin homologue like domain family B member 2              | <i>PHLDB2</i>   | -1.4 | Cytoplasm           | other                      |
| ARL15    | ADP ribosylation factor like GTPase 15                          | <i>ARL15</i>    | -1.4 | Cytoplasm           | other                      |
| STIL     | STIL centriolar assembly protein                                | <i>STIL</i>     | -1.4 | Nucleus             | other                      |
| M1AP     | meiosis 1 associated protein                                    | <i>C2orf65</i>  | -1.4 | Cytoplasm           | other                      |
| PDE9A    | phosphodiesterase 9A                                            | <i>PDE9A</i>    | -1.4 | Cytoplasm           | enzyme                     |
| NEIL1    | nei like DNA glycosylase 1                                      | <i>NEIL1</i>    | -1.4 | Nucleus             | enzyme                     |
| INTS14   | integrator complex subunit 14                                   | <i>C15orf44</i> | -1.4 | Cytoplasm           | other                      |
| TG       | thyroglobulin                                                   | <i>Tg</i>       | -1.4 | Extracellular Space | other                      |
| USP12    | ubiquitin specific peptidase 12                                 | <i>USP12</i>    | -1.4 | Cytoplasm           | peptidase                  |
| HDAC8    | histone deacetylase 8                                           | <i>Hdac8</i>    | -1.4 | Nucleus             | transcription regulator    |
| HDAC10   | histone deacetylase 10                                          | <i>Hdac10</i>   | -1.4 | Nucleus             | transcription regulator    |
| UBXN8    | UBX domain protein 8                                            | <i>UBXN8</i>    | -1.4 | Cytoplasm           | other                      |
| COX4I1   | cytochrome c oxidase subunit 4I1                                | <i>COX4I1</i>   | -1.4 | Cytoplasm           | enzyme                     |
| BEX2     | brain expressed X-linked 2                                      | <i>BEX2</i>     | -1.4 | Nucleus             | other                      |
| ADH5     | alcohol dehydrogenase 5 (class III), chi polypeptide            | <i>ADH5</i>     | -1.4 | Cytoplasm           | enzyme                     |
| CHKB     | choline kinase beta                                             | <i>CHKB</i>     | -1.4 | Cytoplasm           | kinase                     |
| ID2      | inhibitor of DNA binding 2                                      | <i>ID2</i>      | -1.4 | Nucleus             | transcription regulator    |
| RNF111   | ring finger protein 111                                         | <i>Rnf111</i>   | -1.4 | Nucleus             | enzyme                     |
| ZNF362   | zinc finger protein 362                                         | <i>ZNF362</i>   | -1.4 | Other               | other                      |
| ERAP1    | endoplasmic reticulum aminopeptidase 1                          | <i>ERAP1</i>    | -1.4 | Extracellular Space | peptidase                  |
| FAM20B   | FAM20B glycosaminoglycan xylosylkinase                          | <i>FAM20B</i>   | -1.4 | Extracellular Space | enzyme                     |

|               |                                                                                                   |                |      |                     |                            |
|---------------|---------------------------------------------------------------------------------------------------|----------------|------|---------------------|----------------------------|
| ANKZF1        | ankyrin repeat and zinc finger peptidyl tRNA hydrolase 1                                          | <i>Ankzf1</i>  | -1.4 | Nucleus             | transcription regulator    |
| FCHO1         | FCH and mu domain containing endocytic adaptor 1                                                  | <i>FCHO1</i>   | -1.4 | Plasma membrane     | other                      |
| SGCA          | sarcoglycan alpha                                                                                 | <i>SGCA</i>    | -1.4 | Plasma membrane     | other                      |
| PLEKHG6       | pleckstrin homologue and RhoGEF domain containing G6                                              | <i>PLEKHG6</i> | -1.4 | Cytoplasm           | other                      |
| THBS3         | thrombospondin 3                                                                                  | <i>Thbs3</i>   | -1.4 | Extracellular Space | other                      |
| SLCO3A1       | solute carrier organic anion transporter family member 3A1                                        | <i>SLCO3A1</i> | -1.4 | Plasma membrane     | transporter                |
| FKBP8         | FKBP prolyl isomerase 8                                                                           | <i>FKBP8</i>   | -1.4 | Cytoplasm           | other                      |
| PDPK1         | 3-phosphoinositide dependent protein kinase 1                                                     | <i>PDPK1</i>   | -1.4 | Cytoplasm           | kinase                     |
| GPR107        | G protein-coupled receptor 107                                                                    | <i>GPR107</i>  | -1.4 | Plasma membrane     | G-protein coupled receptor |
| APEH          | acylaminoacyl-peptide hydrolase                                                                   | <i>APEH</i>    | -1.4 | Cytoplasm           | peptidase                  |
| ABCC2         | ATP binding cassette subfamily C member 2                                                         | <i>Abcc2</i>   | -1.4 | Plasma membrane     | transporter                |
| NFIL3         | nuclear factor, interleukin 3 regulated                                                           | <i>NFIL3</i>   | -1.4 | Nucleus             | transcription regulator    |
| IL11RA        | interleukin 11 receptor subunit alpha                                                             | <i>IL11RA</i>  | -1.4 | Plasma membrane     | transmembrane receptor     |
| HIVEP1        | HIVEP zinc finger 1                                                                               | <i>Hivep1</i>  | -1.4 | Nucleus             | transcription regulator    |
| CEBPB         | CCAAT enhancer binding protein beta                                                               | <i>CEBPB</i>   | -1.4 | Nucleus             | transcription regulator    |
| SERF1A/SERF1B | small EDRK-rich factor 1A                                                                         | <i>SERF1A</i>  | -1.4 | Other               | other                      |
| MRPS25        | mitochondrial ribosomal protein S25                                                               | <i>MRPS25</i>  | -1.4 | Cytoplasm           | other                      |
| SMARCA5       | SWI/SNF related, matrix associated, actin dependent regulator of chromatin, subfamily a, member 5 | <i>SMARCA5</i> | -1.4 | Nucleus             | transcription regulator    |
| DAZAP2        | DAZ associated protein 2                                                                          | <i>Dazap2</i>  | -1.4 | Nucleus             | other                      |
| FOXO4         | forkhead box O4                                                                                   | <i>FOXO4</i>   | -1.4 | Nucleus             | transcription regulator    |
| SERINC2       | serine incorporator 2                                                                             | <i>SERINC2</i> | -1.4 | Plasma membrane     | transporter                |
| TFIP11        | tuftelin interacting protein 11                                                                   | <i>TFIP11</i>  | -1.4 | Extracellular Space | other                      |
| PCDH9         | protocadherin 9                                                                                   | <i>PCDH9</i>   | -1.4 | Plasma membrane     | other                      |
| MED8          | mediator complex subunit 8                                                                        | <i>Med8</i>    | -1.4 | Nucleus             | other                      |
| GRIN1         | glutamate ionotropic receptor NMDA type subunit 1                                                 | <i>GRIN1</i>   | -1.4 | Plasma membrane     | ion channel                |
| SKIV2L        | Ski2 like RNA helicase                                                                            | <i>SKIV2L</i>  | -1.4 | Nucleus             | enzyme                     |
| PHACTR4       | phosphatase and actin regulator 4                                                                 | <i>PHACTR4</i> | -1.4 | Plasma membrane     | other                      |
| SLC6A20       | solute carrier family 6 member 20                                                                 | <i>SLC6A20</i> | -1.4 | Plasma membrane     | transporter                |
| BARX2         | BARX homeobox 2                                                                                   | <i>BARX2</i>   | -1.4 | Nucleus             | transcription regulator    |
| HKDC1         | hexokinase domain containing 1                                                                    | <i>HKDC1</i>   | -1.4 | Cytoplasm           | kinase                     |
| ITPR2         | inositol 1,4,5-trisphosphate receptor type 2                                                      | <i>ITPR2</i>   | -1.4 | Cytoplasm           | ion channel                |
| NDUFA12       | NADH:ubiquinone oxidoreductase subunit A12                                                        | <i>NDUFA12</i> | -1.4 | Cytoplasm           | enzyme                     |
| SYN2          | synapsin II                                                                                       | <i>Syn2</i>    | -1.4 | Plasma membrane     | other                      |
| NIF3L1        | NGG1 interacting factor 3 like 1                                                                  | <i>Nif3l1</i>  | -1.4 | Cytoplasm           | other                      |
| RDH5          | retinol dehydrogenase 5                                                                           | <i>RDH5</i>    | -1.4 | Cytoplasm           | enzyme                     |
| POLR2H        | RNA polymerase II, I and III subunit H                                                            | <i>POLR2H</i>  | -1.4 | Nucleus             | enzyme                     |
| MCCC1         | methylcrotonoyl-CoA carboxylase 1                                                                 | <i>MCCC1</i>   | -1.4 | Cytoplasm           | enzyme                     |
| DAW1          | dynein assembly factor with WD repeats 1                                                          | <i>WDR69</i>   | -1.4 | Extracellular Space | other                      |
| PRR15         | proline rich 15                                                                                   | <i>PRR15</i>   | -1.4 | Other               | other                      |

|           |                                                                      |                  |      |                     |                         |
|-----------|----------------------------------------------------------------------|------------------|------|---------------------|-------------------------|
| PNPT1     | polyribonucleotide nucleotidyltransferase 1                          | <i>Pnpt1</i>     | -1.4 | Cytoplasm           | enzyme                  |
| DPP4      | dipeptidyl peptidase 4                                               | <i>DPP4</i>      | -1.4 | Plasma membrane     | peptidase               |
| BSCL2     | BSCL2 lipid droplet biogenesis associated, seipin                    | <i>BSCL2</i>     | -1.4 | Cytoplasm           | other                   |
| ZFAND5    | zinc finger AN1-type containing 5                                    | <i>ZFAND5</i>    | -1.4 | Nucleus             | other                   |
| YIPF1     | Yip1 domain family member 1                                          | <i>YIPF1</i>     | -1.5 | Cytoplasm           | other                   |
| NRM       | nurim                                                                | <i>NRM</i>       | -1.5 | Nucleus             | other                   |
| SNTG2     | syntrophin gamma 2                                                   | <i>SNTG2</i>     | -1.5 | Plasma membrane     | other                   |
| POLDIP2   | DNA polymerase delta interacting protein 2                           | <i>POLDIP2</i>   | -1.5 | Cytoplasm           | other                   |
| ATL3      | atlastin GTPase 3                                                    | <i>ATL3</i>      | -1.5 | Cytoplasm           | other                   |
| LATS2     | large tumor suppressor kinase 2                                      | <i>Lats2</i>     | -1.5 | Nucleus             | kinase                  |
| ZADH2     | zinc binding alcohol dehydrogenase domain containing 2               | <i>ZADH2</i>     | -1.5 | Cytoplasm           | enzyme                  |
| PCBP2     | poly(rC) binding protein 2                                           | <i>PCBP2</i>     | -1.5 | Nucleus             | other                   |
| KEL       | Kell metallo-endopeptidase (Kell blood group)                        | <i>KEL</i>       | -1.5 | Plasma membrane     | peptidase               |
| GTF3C1    | general transcription factor IIIC subunit 1                          | <i>GTF3C1</i>    | -1.5 | Nucleus             | transcription regulator |
| MYOG      | myogenin                                                             | <i>MYOG</i>      | -1.5 | Nucleus             | transcription regulator |
| INTS5     | integrator complex subunit 5                                         | <i>Ints5</i>     | -1.5 | Nucleus             | other                   |
| ILRUN     | inflammation and lipid regulator with UBA-like and NBR1-like domains | <i>C6orf106</i>  | -1.5 | Cytoplasm           | other                   |
| ST8SIA4   | ST8 alpha-N-acetylneuraminide alpha-2,8-sialyltransferase 4          | <i>ST8SIA4</i>   | -1.5 | Cytoplasm           | enzyme                  |
| NAA60     | N-alpha-acetyltransferase 60, NatF catalytic subunit                 | <i>NAT15</i>     | -1.5 | Cytoplasm           | enzyme                  |
| GOLGA3    | golgin A3                                                            | <i>GOLGA3</i>    | -1.5 | Cytoplasm           | transporter             |
| RBM4      | RNA binding motif protein 4                                          | <i>RBM4</i>      | -1.5 | Nucleus             | other                   |
| CDC16     | cell division cycle 16                                               | <i>CDC16</i>     | -1.5 | Nucleus             | other                   |
| PGAP2     | post-GPI attachment to proteins 2                                    | <i>PGAP2</i>     | -1.5 | Other               | other                   |
| AFG3L2    | AFG3 like matrix AAA peptidase subunit 2                             | <i>AFG3L2</i>    | -1.5 | Cytoplasm           | peptidase               |
| ZMYND15   | zinc finger MYND-type containing 15                                  | <i>Zmynd15</i>   | -1.5 | Other               | other                   |
| HCFC1     | host cell factor C1                                                  | <i>Hcfc1</i>     | -1.5 | Nucleus             | transcription regulator |
| IL18      | interleukin 18                                                       | <i>IL18</i>      | -1.5 | Extracellular Space | cytokine                |
| HYAL2     | hyaluronidase 2                                                      | <i>HYAL2</i>     | -1.5 | Cytoplasm           | enzyme                  |
| PRDX6     | peroxiredoxin 6                                                      | <i>Prdx6</i>     | -1.5 | Cytoplasm           | enzyme                  |
| RAB11FIP5 | RAB11 family interacting protein 5                                   | <i>RAB11FIP5</i> | -1.5 | Cytoplasm           | other                   |
| PRSS16    | serine protease 16                                                   | <i>Prss16</i>    | -1.5 | Extracellular Space | peptidase               |
| TLK2      | tousled like kinase 2                                                | <i>TLK2</i>      | -1.5 | Cytoplasm           | kinase                  |
| DNAJC10   | DnaJ heat shock protein family (Hsp40) member C10                    | <i>DNAJC10</i>   | -1.5 | Cytoplasm           | enzyme                  |
| NUP62     | nucleoporin 62                                                       | <i>Nup62</i>     | -1.5 | Nucleus             | transporter             |
| TENT5C    | terminal nucleotidyltransferase 5C                                   | <i>FAM46C</i>    | -1.5 | Extracellular Space | enzyme                  |
| CLIP3     | CAP-Gly domain containing linker protein 3                           | <i>CLIP3</i>     | -1.5 | Plasma membrane     | other                   |
| MAFB      | MAF bZIP transcription factor B                                      | <i>Mafb</i>      | -1.5 | Nucleus             | transcription regulator |
| IQCG      | IQ motif containing G                                                | <i>Iqcg</i>      | -1.5 | Cytoplasm           | other                   |
| IGDCC3    | immunoglobulin superfamily DCC subclass member 3                     | <i>IGDCC3</i>    | -1.5 | Other               | other                   |
| LRIG3     | leucine rich repeats and immunoglobulin like domains 3               | <i>LRIG3</i>     | -1.6 | Extracellular Space | other                   |
| NUP153    | nucleoporin 153                                                      | <i>NUP153</i>    | -1.6 | Nucleus             | other                   |
| SLC2A13   | solute carrier family 2 member 13                                    | <i>SLC2A13</i>   | -1.6 | Plasma membrane     | transporter             |

|         |                                                                      |                |      |                     |                         |
|---------|----------------------------------------------------------------------|----------------|------|---------------------|-------------------------|
| SPRY4   | sprouty RTK signaling antagonist 4                                   | <i>SPRY4</i>   | -1.6 | Plasma membrane     | other                   |
| NVL     | nuclear VCP like                                                     | <i>NVL</i>     | -1.6 | Nucleus             | other                   |
| XYLT2   | xylosyltransferase 2                                                 | <i>Xylt2</i>   | -1.6 | Cytoplasm           | enzyme                  |
| CDK5R1  | cyclin dependent kinase 5 regulatory subunit 1                       | <i>Cdk5r1</i>  | -1.6 | Nucleus             | kinase                  |
| H2AZ1   | H2A.Z variant histone 1                                              | <i>H2AFZ</i>   | -1.6 | Nucleus             | other                   |
| LSM4    | LSM4 homologue, U6 small nuclear RNA and mRNA degradation associated | <i>LSM4</i>    | -1.6 | Nucleus             | other                   |
| WDR75   | WD repeat domain 75                                                  | <i>WDR75</i>   | -1.7 | Nucleus             | other                   |
| WNT6    | Wnt family member 6                                                  | <i>WNT6</i>    | -1.7 | Extracellular Space | other                   |
| MMP9    | matrix metalloproteinase 9                                           | <i>Mmp9</i>    | -1.7 | Extracellular Space | peptidase               |
| STK40   | serine/threonine kinase 40                                           | <i>Stk40</i>   | -1.7 | Cytoplasm           | kinase                  |
| L3MBTL3 | L3MBTL histone methyl-lysine binding protein 3                       | <i>L3mbtl3</i> | -1.8 | Nucleus             | other                   |
| CLK2    | CDC like kinase 2                                                    | <i>CLK2</i>    | -1.9 | Nucleus             | kinase                  |
| TRIM28  | tripartite motif containing 28                                       | <i>TRIM28</i>  | -1.9 | Nucleus             | transcription regulator |
| ZBTB43  | zinc finger and BTB domain containing 43                             | <i>ZBTB43</i>  | -2.4 | Nucleus             | transcription regulator |
