# Supplementary material for: Transcriptome Analysis of Bovine Macrophages (BoMac) Cells after Infection with Bovine Immunodeficiency Virus
Source: PubMed Central journal article supplement — J Vet Res. 2022 Dec 26;66(4):487–95. doi: 10.2478/jvetres-2022-0072 (PMC9944999; doi:10.2478/jvetres-2022-0072), 2022-12-26
Supplement: jvetres-66-487_sm2.pdf [file jvetres-66-487_sm2.pdf]

**Table S2.** Top canonical pathways enriched in expressed genes, after selection of canonical pathway related to immune response.

| Ingenuity canonical pathways                                      | −log (p-value) | Ratio    | z-score | Molecules                                                                                                                                                                                                              |
|-------------------------------------------------------------------|----------------|----------|---------|------------------------------------------------------------------------------------------------------------------------------------------------------------------------------------------------------------------------|
| Leukocyte extravasation signaling                                 | 3.8E00         | 1.24E−01 | 1.043   | <i>ABL1, ACTG2, CD44, CLDN3, CXCL12, GNAI3, ICAM3, MAPK10, MMP17, MMP23B, MMP9, NCF2, NCF4, PIK3C2B, PRKCG, PRKCZ, PTK2, PXN, RAP1B, VAV1, VAV3, VCAMI, WAS, WIPF1</i>                                                 |
| PI3K signaling in B lymphocytes                                   | 3.49E00        | 1.33E−01 | 0.500   | <i>ABL1, ATF2, ATF4, CALM1 (includes others), CD81, CREB1, FOXO3, ITPR2, MALT1, PDPK1, PLCD1, PLCL1, PLEKHA4, PPP3CB, PRKCZ, RAP1B, RRAS2, VAV1, VAV3</i>                                                              |
| Virus entry <i>via</i> endocytic pathways                         | 2.34E00        | 1.25E−01 | N/A     | <i>ABL1, ACTG2, AP1G1, CLTB, CLTC, FOLR1, ITGB3, ITSN1, PIK3C2B, PRKCG, PRKCZ, RAP1B, RRAS2</i>                                                                                                                        |
| Neuroinflammation signaling pathway                               | 2.29E00        | 9.15E−02 | −0.408  | <i>ATF2, ATF4, BACE1, BACE2, CASP3, CD200, CREB1, CREB3LI, CXCL12, GABRB3, GAD1, GAD2, GRIN1, IL18, MAPK10, MAPK4, MMP9, NCF2, NCSTN, PIK3C2B, PLA2G12A, PPP3CB, PRKCG, PSEN1, S100G, SLC1A3, TRAF3, TYROBP, VCAMI</i> |
| Mechanisms of viral exit from host cells                          | 2.19E00        | 1.71E−01 | N/A     | <i>ACTG2, PRKCG, PRKCZ, SH3GL3, SH3GLB2, VPS28, VPS36</i>                                                                                                                                                              |
| Prolactin signaling                                               | 2.13E00        | 1.28E−01 | 0.707   | <i>CEBPB, CSN2, NR3C1, PDPK1, PIK3C2B, PRKCG, PRKCZ, RAP1B, RRAS2, SOCS5, STAT3</i>                                                                                                                                    |
| Role of MAPK signaling in promoting the pathogenesis of influenza | 2.04E00        | 1.15E−01 | 0.577   | <i>ATF2, ATP6V0A4, ATP6V1A, ATP6V1F, ATP6V1H, CASP3, LCAT, MAPK10, NUP153, PLA2G12A, PRDX6, RAP1B, RRAS2</i>                                                                                                           |
| CXCR4 signaling                                                   | 1.92E00        | 1.01E−01 | 1.291   | <i>Cdc42, CXCL12, EGRI, GNAI3, GNB1, GNG3, ITPR2, MAPK10, MYL9, PIK3C2B, PRKCG, PRKCZ, PTK2, PXN, RAP1B, RHOG, RRAS2</i>                                                                                               |
| Phagosome maturation                                              | 1.84E00        | 1.01E−01 | N/A     | <i>ATP6V0A4, ATP6V1A, ATP6V1F, ATP6V1H, CALR, CTSA, CTSC, CTSG, CTSH, DYNC1L12, NCF2, NSF, PRDX1, PRDX6, VPS28, VPS39</i>                                                                                              |
| IL-15 production                                                  | 1.75E00        | 1.06E−01 | 1.941   | <i>ABL1, CLK2, CSK, DDR1, IGF1R, LCK, MET, MUSK, NTRK1, PRKCZ, PTK2, RYK, YES1</i>                                                                                                                                     |
| fMLP signaling in neutrophils                                     | 1.55E00        | 9.92E−02 | 1.155   | <i>CALM1 (includes others), GNAI3, GNB1, GNG3, ITPR2, NCF2, PIK3C2B, PPP3CB, PRKCG, PRKCZ, RAP1B, RRAS2, WAS</i>                                                                                                       |
| Fc Epsilon RI signaling                                           | 1.54E00        | 1.02E−01 | −0.302  | <i>GRAP2, MAPK10, PDPK1, PIK3C2B, PLA2G12A, PRKCG, PRKCZ, RAP1B, RRAS2, SYNJ1, VAV1, VAV3</i>                                                                                                                          |
| FAT10 signaling pathway                                           | 1.48E00        | 1.25E−01 | N/A     | <i>PSMA1, PSMB10, PSMC5, PSMC6, PSMD1, PSMD10, PSMD8</i>                                                                                                                                                               |
| FLT3 signalling in haematopoietic progenitor cells                | 1.45E00        | 1.1E−01  | 0.707   | <i>ATF2, ATF4, CREB1, CREB3LI, PDPK1, PIK3C2B, RAP1B, RRAS2, STAT3</i>                                                                                                                                                 |
| IL-8 signaling                                                    | 1.38E00        | 8.57E−02 | 1.500   | <i>CCND1, Cdc42, GNAI3, GNB1, GNG3, ITGB3, MAPK10, MMP9, MYL9, NCF2, PIK3C2B, PRKCG, PRKCZ, PTK2, RAP1B, RHOG, RRAS2, VCAMI</i>                                                                                        |
| PFKFB4 signaling pathway                                          | 1.33E00        | 1.25E−01 | −0.447  | <i>ATF2, ATF4, CREB1, CREB3LI, HK3, PRKACA</i>                                                                                                                                                                         |
